# Supplementary material for: Review NPF and NRT2 from Pisum sativum Potentially Involved in Nodule Functioning: Lessons from Medicago truncatula and Lotus japonicus
Source: Preprints.org preprint supplement (doi:10.20944/preprints202311.1622.v1), 2023-11-27
Supplement: Supplementary file 1 [file supplementary]

## Sheet: Table 1
Supplementary Table 1 : complete list of P. sativum NPF Proteins.
Clade	NPF name	Accession number	Alternative RNAs	Sequence size (AA)	Protein sequence
1	PsNPF1.1	Psat7g015080	3	616	MDKNTLYFSPSEQTSTHNKNTIVLDNNEVYYLFVTRRRKMEQNKDIEQVVNKKLGGYRTMPFIIANETFEKVATVGLHVNMILYLLNEYQLEPSTAAIIIFLWNAGSNFMPLFGAFLSDSCLGRFRVIAWGTIIHLLGLIVLWLTAIIRQARPPRCDEKPCTSTTGAQFLFLFSSLALMAVGAGGIRPCSLAFAADQINDPKSAKNERVMRSFFNWYYVSVGVSVMVSVVFIVYIQVKAGWVVGFGIPVGLMFFSSVMFFLGSFMYVKVKPNKSLLAGFAQVIVASWRNRHMKLPQNSSGLWYSHSGSILVHPTDKARFLNKACIMKNREKDLDSNGAPIDPWSLCTVRQVEELKAVIKVLPIWSTGITIGITISQQSFSVVQANTMDRKFHNFEIPST…
	PsNPF1.2	Psat5g299200		633	MKMDKEVQLSSVVDADHEMVEISHQSERRKGGLITMPFIIANEALARMASLGLLPNMITYLMGSYRLHLGKATQILLLSSAASNFTPVVGAFIADSYLGRFLGVGLGSAVSFLGMTLLWLTAMFPQARPPSCNHQNGGCKSATKGQMAVLLSAFGLMSIGNGGLSCSLAFGADQVNRKDNPNNHRVLEIFFSWYYAFTTIAVIIALTIIVYIQDHLGWKIGFGVPAALMLLSTILFFLASPLYVKITKRTTLFTGFAQVTVAAIKNRKFQLPSQNSAEFYHHNKDSDLVVPTDRLRFMNKACVIRDREQDIDSDGSAKNPWRLCTVDQVEELKAIVRVIPLWSTGIMMSLNIGGSFGLLQAKSLDRHITSHFEVPAGSFSVIMVGAIFIWIVLYDRVLI…
	PsNPF1.3	Psat0s258g0240	2	586	MKMDKEVEHSSVFEISQQSERRKGGLITIPFIIANEALARMASLGLLPNMITYLMGSYRLHLGKATQILLLSSAASNFTPVVGAFIADSYLGRFLGVGLGSAVTFLGITLLWLTAMFPQARPPSCNHQTGGCKSATKGQMAVLLSAFGLMSIGNGGLSCSLAFGADQVNRKDNPNNHRVLEIFFSWYYAFTTFAVIIALTIIVYIQDHLGWKIGFGVPAALMLLSTLLFFLASPLYVKITKRTTLFTGFAQVTVAAFKNRNFQLPSQNSAEFYHHNKDSDLVVPTDRLRFMNKACVIKDHEQDIASDGFAINPWSLCTVDQVEELKALVRVIPLWSTGIMMSLNIGGSFGLLQAKSLDRHITSHFEVPAGSFSVILVGAIFIWIVLYDRVLIPLASKIK…
	PsNPF1.4	Psat7g255240		609	MEKINEIELSSVPHTKTGFRKDIISQPQINNKGGFITMPFIIANESLARVATLGLLPNMILYLMGSYNLHLSKATHILLLSVALTNFMPLIGAFIADSHLGRFLAVGLGSIITFMGMVLLWLTAMIPQARPPPCNPATERCISATTAQMTMLISSLALMSIGNGGLQCSIAFGADQVNRKDNPNNQRALEIFFSWYYASSAISVIIAFTGIVYIQDHLGWKLGFGVPAALMFFSTFFFFLASPLYVKNKTNGSLFTGFLQVVVAAYKNRKLRLPPKNSDRMYHRSKDSEHIVPTDKLRFLNKACFIRSPEKDISSDGSASERWSLCTIDQVEEFKAIIKVIPLWSTSIMMSLNIGGSFGLLQAKSLNRHITQNFEVPAGSLSVIMIFTIFIWISLYDRV…
	PsNPF1.5	Psat6g033120	2	593	MEYPNLDATNEKLMQNSISSSSSSSQPRKGGFRTMPFIIVNECFEKVASYGIMPNMILYLRDDYNMPIPKATSVLYTWSAMSNILSIFGAFLSDSYLGRFNVIFIGSLSSLLGLTILWLTAMIPSLKPSDISSSSLVQVFDSATSSQLAVLFISLGLISIGAGCVRPCSIAFGADQLAVKENLDDGRILDSYFNWYYTSIAVSTIIALSVIAYIQENLGWKIGFGVPAVLMLISAFSFVAGSPYYVKVRPSESLLTNFIRVVVVAIKNRKLSLPDHGFDRYCQGRDSDLMVPTDSLRFLNKACVIRNHERELNPDGSISNPWNLCTIGQVESLKSLLRVIPMWSTGICMMATQSSFSTLQAKTMNRRLFGNFNFPAGSFNLIMIFTLSVVIPLYDRIVV…
	PsNPF1.6	Psat6g085840	2	518	MASIGILPNMIVYLMGTYKIPLGKATQILILSSAATNFMPVVGAFVADSYLGRFLVVGLGSTVSFLGMAMLWLTTMIHPAEGGKSATLVEMAILLSALGLMSIGSGGLSCSLAFGADQVNTKDNLNDNHSFVEIFFSWYYAFTLISIIIGLTGIVYIQDHLGWKIGFGVPAILMLLSTILFFLASPLYVKIHKRTNFFTGFSQVVSASYKNRNIPLPSKNSTQCYHHYTDSDCAVPTDKLRFFNKACLIKDHEQDKACDGSAINPWSLCTVDQVEELKSIVRVIPLWSTGIMMSLNIGGSFGLLQAKSLDRHITSHFEVPAGSFSVILVGAVFIWIVIYDRVLLPFVSKIRGKPVRICAKKRMGIGLFFYFLYLVTAATFETIRRKKAINDDTNDGVLK…
	PsNPF1.7	Psat0s1315g0280		569	MENTVQEKEPLISITKAKGGFRTLPFIIANQAFEKMSSYGIMLNMVLYFTRHYGMQTAKATNIILLWSAASYFTPVLAAFLADSYFGRFTIIAFGSFLTLLGMLLFWLTAIIPNLSPCDQLTMICNSPTTSQLAFLYFSLCLMAIGAGGVRASSLAFGVDQLNKKERDEGIIERYFNWSFALTGAALLIGMTVLVYIQENFGWIVGFGVPVVLMFISTLSFFLASSLYVKVEPKGNVISECARVVAASYRNRNLNLPSPNVSNDGMYYYDKDSEMLMPSDKLRFLNKACLIQNPQQDFTQDGRLKSQWSLCTIDQVEAFKSMIKIIPIWITGMIMSINFSQGAFSVLEASIMNRRITSNFEIPAASMSTFMALSTVFWLVLYDRVIVTSASKLRGSPTR…
	PsNPF1.8 (New)	Psat5g023520		303	MEKVIEEQEPLLNQEQNSNGIVVNNNKGGFRTLPFIIANEACEKVASIGLMPNMIMYLTKEYNMHTAEATNFILLWSAATNFTPLVAAFLADSYFGRYSMIAFGSLSSLLGMVLLWLTTIIPLSRPMCSNSCNSPTTIHLIKVSQQSMHNEKSLRRFDTKRKRFKAMESLMAINQGYSNQPEAVVNMSALWLLPRQIIDGLAEASGVVGQTEFFLNELPESMSSVASTLGGLGISVANLVASFILSFVDSVSGSGGNESWVASNINKGHYDYYYSFICALSILNFVYFVYCSKSYGPCKNRQK-
2	PsNPF2.1	Psat5g276840		548	MDDKLTSPKEPQSLSNGKKHGGWRTFPFFIGTVAGLSLASAGIVGNLIVYLIKEFNIKSIDAAQIVNVVVGSSNLVPLVTAVVADSFFGSFSVAFASSCVSLLGTVTLFLTATINSLKPHPCNDSSSTCKPPTKIQYTVLYISIVLISIGFGGSRFTSASLGANQFDKPEHQGIFFNWFFFAFYVASCVALTGVIYIEDNFGWALGFGVCAVATFLGVVVFLSGYGFYRNDKPNGSAVLDLGRVFVASLRKRKWKNSSIMEDYYTGATGYDDIVQILPPTKPGKRLRFFNRAALITDADLNSDNTIKKSSWRLCTVQQVEDFKKIIGILPLWTSSIFLATPIAIQSSLTVLQALVMDRSLGSHFKIPAGSVSVIILISTAIFLTFLDRVILPGWHKVTG…
	PsNPF2.2	Psat4g051720		611	MEEKVNNTNSSSSSPLELEHADAIPVNGDEASPQEAGGWRSVKYIIGNESFEKLASMSLISNLTVYLLTNYNLSGLFVVNTVQIWNGSSNITSIIGAFISDAYLGRFRTLLYGCIASLMGILVMTLTAGIHGLRPHACKESDRPNCEHARDWQLGVLFIGLGFLSIGAGGIRPCNIAFGADQFDTRTEKGRGQLESFFNWWYFTFTVALVIALTGVVYIQTNVSWALGFAIPTACLAFSIAIFLLGRKTYICKKPQGSVFTGMVKVVSAACRKRKIRIVDRTLYDPISRVSDSEGVRLVQTDKFKFLDRAAVITDQSELNDEGIAKNDWRLCSLQQVEHLKCLLGILPVWVTGTCCFIIMDQQNTFGVLQVIQTDRSIGSHFKIPPGWMNLVSMIALSL…
	PsNPF2.3	Psat3g132960		588	MNENHSSEIHDSSSTKRKRGGWKSVKYILGNETFEKLASMSLIANLIVYMHTQYNMDTTFSVEVFNIWSGFTNFLPLVAAYLADAYTGKFYMLIFGSIASFLGMGFMSLGAGVPSLRPPPCPPLSDCVQMNPTNTQLAVLYVGLGFFAIGSGCLRPCNIAFGADQFDIKTEKGRAQLESFCNWWYFLFTIALLVALTLVVYIQTNISWFLGYIIPTVCFAFSLTIFLIGQGTYVRLKPKGSVLCDLFKVVLAAIRKHHVDMKKDSELSFYDPPLPSNETEESRHANLKLAHTNRFRFFEKAAVITNQTEIDNNGKSIDSWRLCSLQQVEELKSIVTTLPVWLAGIICFLSMGQANSYGVLQALQTDKSIGKSFKIPPAWMGLVPMISLSLWILLYEKIY…
	PsNPF2.4	Psat4g053920	2	589	MGESETTMKAIEKESFEISGKHEFEDDDPKIIYRGWKVMPYIIGNEIFEKLGAIGTLANLLVYLTTVFNLDNVTAANIINIFSGSTNFSTLLGAFFSDTFFGRYKTLAVCSIICFLGLLGIEFTALFKNLHPPQCKKESATCKGPTPGQIFFLMSAFVLMIIGSAGVRPCSLAFGVDQFNPKTDSGKRGINSFFNWYFFTVTFAQMVSLTLIVYVQSNVSWAIGLGIPAALMFIACVVFFVGTKYYVRIKPNGSPIKSIVQVLVVAVKKRGLKLPSQNPMLSLFDYVPPSSLNLKLPYTNQFRVLDKAAIITPRDTINPDGSAADPWSLCSIQQVEEFKCLVRLLPIFFSGILFFLSLSQQHTFLVFQALQSNRRLGNSNFNIPGASYQVVLMLSMTIW…
	PsNPF2.5	Psat4g051880		567	MPFIIGNEIFEKLGAIGTLSNLLVYLTTVFNLENIAATNIINIFNGSTNFATLIGAFSSDTYFGRYKTLAFCTMASFLGLLVIQLTAAVEKLHPHSCEELEFTTCQGPTEWQMTVLKTGLGLLMIGAAGIRPCNLAFGADQFNPNTDSGKKGINSFFTWYYFTFTLAQLISLTIIVYIQSNVSWAIGLGIPAALMLLSSVIFFSGAKMYVKVKPSGSPITSIVQVIVVSTKKRKQKLPEYLYPSLYNYVPLKSMNSKLPYTYQFRFLDKAAIMTPQDQLNPNGSASDPWNLCSMQQVEEVKCLLRVLPIWASAVLYYVVIVQQHTILVFQALLSDRRIGQSKFMIPGASYYVFLMISVAIWLPIYDRKVVPFLQRITRKEGGITLLQRMGIGIFLGILS…
	PsNPF2.6	Psat4g051840	4	593	MKKNEKESLEINQVPTINYRGWKVMPFIVGNETFEKLGTTGTLSNLLVYLTTVFNLSSIEATNIVNIFNGSASLATLLGAFLSDTYFGRYKTLGFSTFASFLGLLVIQLTAWIKKMHPAECGNEKTTCTQPSTGQMAFLLLGFGFLIIGAAGIRPCNLAFGADQFNPNTDSGKKGINSFFNWYFFTYTFAQMVSLSLIVYVQSDVSWALGLGIPAALMLFSCIVYFLGSKYYVKVQATGSPVTSIVQVVYVAIKKRKLNLKEDEYSLVPLFSYISPHSINCKLPHTPQFRFLDKAAIITPEDNINPDGSASDPWNLCSIQQVEEVKCLVRVLPVWVSGILYYVALVQQSTMLVFQALQSDRTFFNTNFKIPAASFTIFTMLSLTIWLPIYDRIIVPTIR…
	PsNPF2.7	Psat2g126520		608	MSEENNKTNHYESNGLSSSTKEKEQNIEKHGNKKPGGWKAMPFILGNETFERLAAFGLFANFMVYLTREFHLDQVHASNILNMWGGITNFAPLLGAFISDTYTGRFKAIAFGSFFSLLGMTVVTLTAWLPQLHPPSCSPQQQTLNQCVKATNSHVGFLFMGLIFLSIGSSGIRPCSIPFGVDQFDPTTEEGKKGINSFFNWYYTSFTVVLLITQTVIVYIQDSVSWKFGFAIPTLCMFCSIILFFVGRKIYVHVKPEGSILSSIAQVLVASYRKRKVKVPCEKVVDGIFYDPPLIGSAILSKLPSTNQFRVLDKGALIMEGDLNLDGTIVNQWNLVSIQQVEEVKCLARTFPIWAAGILGFTAMAQVGTFIVSQAMKMDRHLGPNFQIPAGSLGVVSFI…
	PsNPF2.8	Psat0s1448g0200		579	MDKKCSIPSLKKKLLDVESLLVESKQETPQRKPGWKAMPYILGNDTGERLATFGMQTNFVIYLMKVYNMDQVLAANIMNTWVAISNIVPLIGALVADAYLGKFRTIAVSSFASLMGLMILMLTAWIPELHPAPCPIEQQQLGVCNGHTNFQLWILIFGLFWLSIGTGGIRPCSIPFAIDQFDMTTVEGRHGSSSFYSLYYTTQTIIMLINQTIVVYIEDSVSWTLGYGIFTLFMLISIIVFFAGTRVYAYVQPEGSILSSIAQVLVAARHKRHRHLPVIKDTQEAFYDPPLLNDSEGKLPLTKEFRCLNKAALVVEEDEINNDGSIKDPWKLCSIKQIEELKCILKIMPIWITSIIMFIPVGQLSIFSISQALKMDRNIEFLNFEIHAGSINVISLVAI…
	PsNPF2.9 (New)	Psat4g053840		261	MITPRDKINPDGSAADPWSLCSIQQVEELKCLVRVLPIFFSGILFFLVVTQQHTVLVFQALQSNRRVGNSNFNIPAASYSVFIMLSTTLWLPIYDRLVIPFLQRFTGKEAGITILQRIGVGIFLSILSMFVSALVEKQRRHLGLTNPIGIQPRKGAISSMSGFWLVPQLIIAGLSEAFCAVGLTEFYYKQFPENMKTIAGSLFFCSMAGSSYLSAFLVSVVHKTTSNSATGNWLSEDLNKGRLDYFYYLIAAIELFNFGQA-
	PsNPF2.10 (New)	Psat4g053800		302	MGEIETTMKEIEKESFEISEKHEVDDDPKIIYRGWKVMPYIIGNETFEKLGAIGTLVNLLVYLTTVFNLKNITATNIINIFHGSTNFATLLGAFFSDTYFGRYNTLGFCTITSFLGLLVIQLTAVFKNLHPPACSKESSTCIGPSAGQIFFLFSGFFLLLIGAAGVRPCNLAFGVDQFNPKTDTGKKGINSFFNWYYFTFTFAMMVSLTLIVYVQSNVSWAIGLGIPAALMLLACVMFFMGDKLYVKVKPNGSPIKSIVQVLVVGVKKRRLKLPSQHPMLSLFDYMPSKCDYPKLPYTYQFR
3	PsNPF3.1	Psat2g097640		588	MHCRKEQSFEKMEQNGNHPRKKKGGLVTMPFIFANEVCEKLAVVGFNTNMISYLTKELHMPLTKAANTLTNFGGTASLTPLLGAFISDSYAGKFMTITVASIIYQIGMISLTLSAVLPQLRPPPCKGEEVCQEASSGQLAILYVSLLLSALGSGGIRPCVVAFGADQFDELDPNQKTKTWTYFNWYYFVMGTSILVAVTVLVYIQDNVGWGWGLGIPMAAMFISIITFIGGYKLYRNLNPEGSPFTRLVKVGVAAFRKRKITKVPNSNMLYQNHELDADIALGGMLLHSQQFKFLDKAAIVTEEDNVKTPDLWRLSTVHRVEELKSIIRMGPIWASGIILITAYAQQGTFSLQQAKTMNRHLTKSFQIPAGSMSVFTILTMLTTIAFYDRVLIRVARKF…
	PsNPF3.2	Psat0s1126g0080		606	MEEEKSIRGNGEKEKEKKNGKQRGGIRTLPFILANEVCDRFASSGFHANMISYLTQQLNMPLVSASNTLSNFNGVSSLTPLLGAFIADSFAGRFWTIVVATIIYELGLITITISAIMPQFHPPPCPTQLNCEEAKSSQLWILYLSLFLAALGSGGIRSCVVPFSGDQFDMTKKGVESRKWNLFNWYFFCMGFATLSALTIVVYIQDHMGWGWGLGIPTIAMFISIIVFVLGSSLYKTVKPNGSPFVRVAQVIVAAFKKRNEVLPNDSEGLYQNMELDSPISLEGRLSHSNQFKWLDKAAIVTKEEDKNPNAKPNLWNLATVHRVEELKCIIRMLPIWASGILLITAASHQSSFVIQQARTMNRHLSHSFQLSPANMSIFSVLTMMIGIVLYERLFVPFA…
	PsNPF3.3	Psat3g081520		610	MEIEKGIKDGMEMVEKEDSKKMNHRRRGGIRTLPFIFANEACDRFASAGFHSNLISYLTQELNMPLVEASNTLTNFGGTSSFTPLLGALLADSFIGRFWTITIGCLIYELGLISITISTTLPYFRPPPCPTQLNCQEPTSLQLSPLYVSLLLTSLGSGGIRPCVVPFSADQVDMTKDGVASRKWNLFNWYFIIMGFASLSALTIVVYIQDNMGWSLGLGIPTIAMLISIILFVLGLPFYKNVKPEGSPLVRLAQVIAAAVKKRNEILPDDPKLLYRNRELDAAISLEGDLLHSNQYKWLDKAAIITDVDAKDSNAPPNLWNLATVHRVEELKSIIRMLPIWASGILLITSSSHLGSFVIQQARSMDRHLGPSFQIAPANMSIFSVLTMMTGVILYERLF…
	PsNPF3.4	Psat3g081400		596	MEIGKSIGSEELQNKKKVKSQRRGGIRTLPFILANEVCDRFAVAGFNGNLISYLTQQLNMPLVSAANTLTIFGGTASFTPLIGALISESFAGHFWTITIGSIIYQLGMISITLSSILPHMRPPPCPTQLNCQEASSSQLSMFFISLVLISIGSGGIRPCVVPFLGEQFDMTKKGVASRKWNIFNWYFFFMGIASLSALTIVVYIQDNTGWGWGFGIPTIVMFLSIVAFVFGSPFYKTEKPKGSPLVRLAQVIVAAVKKRKEVLPNDPKHLYQNREVDAGISLEGRLLHTNQYKWLDKAAIVTGEDFTEQNAPPNFWKLVTVHRVEELKSIIRILPISASGILLIAASAHLPSFVIEQARTMDRHLSHTFQISPANMSIFSVITMMTGVILYERLFVPIV…
	PsNPF3.5 (New)	Psat3g081600		535	MEIEKGNKRSMEMVEKEVEIEGNKKRNNYQRGGIRTLPFIFGNEICDRFASAGFHSNLISYLTQELNMPLVSASNTLTNFGGMSSFTPLIGALFADSFVGRFWTITIGCLIYELGLISITISTILPYFRPEPCPTQVNCQEATFSQLSTLYISLLLTSLGSGGIRPCVVPFSADQFNMTKNGSPLVRLAQVIVAAVKKRNEKLPNDLKLLYQNKELDAGISSEGTLLHSDQYKWLDKAAIVIEKDAKDSNVLSPNLWNLVTVHRVEELKSIIRMLPIWASGILLIASSSHIHSFMIQQARSMDRRLSHSFQISPAHMSIFSVLTMMTGVILYDRLFVPFARRFTKNPVGITCLQRMGVGFVINIVATIVSALVEIKRKNVAAEYNLLDDPKAIIPISVF…
4	PsNPF4.1	Psat0s2625g0080		526	MDSELSNIGSGEYIDYKGKTADPRQHGGIRAASLACVVEIMQCLVITCNAVTLVDYFLKSMHYSVAHSSNMVTNFMGTAFMLTLLWGFISDSYITRFTTFILSNVLQISGLLMLTYQAQNPNLQPPENKTPSYVQALFLYVGLYVIAIGVGGIRSTLAAHGADQLDQTNKSLISSYFSWYFFSLCIGGLLATSVMVSIEQKYGWSTSFTIMVFVSSLALCTFVSGFSLYQYKRPSGSSVTRIIQVLAASIRNVKVSTAGCLNHDVIEQLLPREQTHEKFKVLNKALMDENIDVAQVKETKIFLGLLPIFLITIMMNCSVAQIMTFSVQQGNLMDRKLHNFIIPAQSIAVIPIIISLTFIILFEQFKHMNKNKGKTTNNKIYQPLFRMGIGLALVSISMF…
	PsNPF4.2	Psat3g152280		526	MDPELSDIGSDEYTDFKGKAADRRKHGGIRAASLACVVEIMQSLIISCNGITLVDYFFKSMHYSVAYSSNMVTNFLGTAFLSSIIWGFISDSYLTRFTIFVFSGGLQLMGLLMLTYQAQNPNLQPPENQKPSTIQALYLYIGLYCTAMGIGGVRSTLAAHGADQLDQTNKSLISSYFSWYFFSVCAGSLLSSGVMVSLEQKYGWSTSFMIMVFVSSLALCTFVSGFSIYRYKRPAGSPVNRIIQVIVTSIRNTMVPTTESLNHDVTEQLLPKETSYNKFKFLNKALIDQNISVAQVKETKTFLGLLSIFLTTIMVNCSVAQILTFSVQQGNLMNRNIHSFTIPTQSLAIIPIIISLTFIIIFEQLKHMNKKKGITSNNKFYQPLFRMGMGLSLVSVSMF…
	PsNPF4.3	Psat3g152120		520	MDPELSNVESGKYTTDRSNHSGIKAASLACVVEIMQSLIVSCNAVTLGDYFYRSMHYPVAHSSTMVTNLLGTASMLSIIWAFISDSYITRFTTFVISGGLQLMGLVMLTYQSQNPNLQPLENETPSNTQALYLYIGLYCTAMGMGGIKSTLAAHGADQLDQTNKSLISSYFNWYFFSLCIGALLSTTVMVSIERKYGWSTSFMIMAFVTSLLLCTFVSGYSLYKYKRPAGSPVSRIIKVLVASVKNIKISTTGSLNHDVTEQLLPREQTHNKFKFLNKALMDQNLGDAQVKETKTFLGLLPIFVTTIMMSCSLAQSLTFLVQQGNLMNRKIFSFTIATQSLGIVPIIISLIFIITFEQFKKMNKKKGTTTNHKIYQPLFRMGIGLAMVSISMLVASIME…
	PsNPF4.4	Psat1g223920		567	MDNNNNNIPFPKDDETSTTVDWRGRPSNPKDHGGARAAAFVLGLQAFEIMAIAAVGNNLITYLINDMHFSLPHSANIVTNFVGTIFLIALLGGFLSDSFLGTFSTILIFALIELSGFILLSAQAHFPQLKPPPCHQNSVCIQPKGFNTLIFYIAIYMVALGSGCIKPSMISHGANQFNPQSNNLSTYFNATYFAFSLGELIALTLLIWVQTHSGMDAGFAVSAAVMALAFIFFISGTLYYRNKPPQPTVFLPILQVFVAAILKRNKISPSTQQGIGGQHSSKMRFLEKACIQQEGGNNTKESQWRLCSVEQVDQAKILLSVIPIFACTIIFNTVLAQLQTFSVQQGSAMDTHITESFRIPPASLQAIPYVLLILIVPLYDTLFVPFARKITGHESGITP…
	PsNPF4.5	Psat0ss8606g0080		585	MVDQEETEELKLLAEWKRKKGGFRATMFIFVLSALDNMGFVANMVSLVLYFYGVMHFDLSSSANTLTNFMGSTFLLSLVGGFISDTYLNRFTTCLIFGSLEVLALAMVTFQAASGHLHPNACGKSSCVKGGIGVMFYVSLSLYALGIGGVRGSMTAFGADQFEEKDPNEAKALASYFNWLLLSSTLGAISGVTGVVWVSTQRAWHWGFFIITIASSIGFVTLALGKPFYRIKVPGDSPTIRIAQVIVVAFKNRKLSLPESHEELYEISDKDATVEKILHTSQIRSLDKAAILQENMKPQPWKVCTVTQIEEVKILTRMLPIVASTIIMNTCLAQLQTFSVQQGNIMNLKLGSFTVPASSIPVIPLIFISILVPIYELFFVPFARKITNHPSGITQLQRV…
	PsNPF4.6	Psat5g045120		569	MGICRDMCMQPRVQRRLGGKRAALFVYAMEGLENMAFVANAVSLITYFLGDMNFSLTKSATTLTNFMGTAFLLPLVGGLICDTYLSRFKTCVLFACMELLGYGILTVQARFQQLRPIPCKDIAPIHMNQCKPAAGSQAAILYTGLYLVALGTSGIKAALPALGADQFDDNDPKEASQLSSFFNWFLFSLTTGAIVGVTVIVWISTNQGWYWSFTVCTIAVLFSILSICMGKSLYRNNTPKGSPLIRIIQVFVAAFKNRKLQIPENEDEMHEIHEKERGDNYEILKRTDQFRFLDRAAIGKNSTGSWNLCTVTQVEETKILVRMLPIILSTIFMNTCLAQLQTFSIQQSTTMNTNILGFKMPGPSLPIIPLLFMFVLIPLYDRFFVPFIRRFTGIPTGIR…
	PsNPF4.7	Psat7g067040		592	MEEELVDGKVDWRGRTAVRHKHGGMKVSLLVLAAFAFENMATLSLAVNLVSYFTGIMHYELADAANMVTNYAGVSYMLSIVVAVLADTLIGRYKSVVFSGSIECVGLALLAIQAHYRSLKPAICNLYDQNAVCEKIKGNHEAFLLVGLYLLAFGSAGLKASLPPHGADQFDERNPKEARQMSSFFNGLLLALCVGGSVSLTFNVWIQDRKGWDWGFGISTIAIVFATVTFAFGLPLYRIQVAQRTNSLIEILQVYIAAIRNRNLPLPADSEQLYEIEQDKEAAMEIEFLPHRDIFRFLDKAAIERKSNAIQSEKQEIPSPWKLCRVTQVENAKIILSMIPIFCCTIIMTLCLAQLQTFSVQQGFTMNTRIAKHFNIPPASLPIIPVAFLLILIPFYDQI…
	PsNPF4.8	Psat7g067000		594	MTKFSTTMEEELVDGKVDWRGRTAVRHKHGGMKVSLLVLGAFAFENMATLSLAVNLVSYFNGIMHYELPDAANMVTNYAGVSYMLSIVVAVLADTLIGRYKSVVFSGLFECLGLALLTIQAHYRSLKPAICNLYDKNAVCEKIKGSHEAFLFIGLYLLAFGSAGLKASLPSHGADQFDERNPKEARQMSSFFNGLLLAICIGGSVSLTFNVWIQDSKGWDWGFGISTIAIVCATIVFAFGLPLYRIHVAQRTNSLIEILQVYIAAIRNRNLPLPADSEELYEIEQDKEAAMDIEFLPHRDIFRFLDKAAIERKSNDVQSEKPKVPSPWKLCRVTQVENAKIILSMIPIFCCTIIMTLCLAQLQTFSVQQGFTMDTRIAKHFNIPPASLPIIPVAFLLIL…
	PsNPF4.9	Psat4g053360	2	607	MHFVYHLCSNITKSALHQIKDMEEEARVQVWEGYVDWRNRPAIKGHHGGMLAASFVLVVEVLENLAYLANASNLVLYLSKFMHFSPSTSANIVTNFMGTAFLLAILGGFLADAFFTTYSIYLISAAIEFMGLLMLTIQAHMPPLKPPNCVKGLGSTNSLCQTVQGGKEAMLYAGLYLVALGVGGIKGSLPPHGAEQFDETTAEGRKKRSEFFNYFVFSLSCGALFAVTFVVWIEDNKGWQWGLGVSSASILLSIPVFVLGAHKYRTKIPAGSPITPMFKVLVAAICNNYKSKNSSANAITSMPTTPSDTIEKGDQEQTNNRKEMMIMTDQTPITQSLKCLNKAVMKPVHPMLKCTVKELEEVKTVLKLLPIFMSTIMLNCCLAQLSTFSVQQSSTMNTM…
	PsNPF4.10	Psat4g131920		578	MEFEQHHATRWIGYVDWRNRPALRGKHGGMIAASFVLVVEILENLSFLANASNLVLYLRKYMHFSPSKSANNVTNFMGTAFLLALLGGFLSDAFFTTYRIYLISAVIEFLGLIILTTQASVTSLQPPTCDPTTECEEVNGAKALMLFAGLYLVALGAGGIKGSLAPHGAEQFDENSVSGRKHISTFFNYFVFCLSCGGLIAVTFVVWIEDNIGWKWGFGIATISMFLSIPVFLAGSTRYKNKIPSGSPLTTILKVLAAAAMNKFVSRNSSSAVVNMTSSPLNPNSIRKQEESSSSKEIKEIKETQTPSTTLKFLNSAIENESIKCSVEELEDVKIVLKILPIFCCTIVLNCCLAQLSTFSVEQAATMNTKIGSLKVPPASLPIFPIIFIMILAPIYDHI…
	PsNPF4.11 (New)	Psat6g156440		608	GDKEVKEELKPIIQWKKQKGGFRASMFIFVLSALDNMGFVANMVSLVLYFYGVMHFDLSSSANTLTNFMGSTFLLSLVGGFISDTYFNRLTTCLLFGSLEVIALVMITVQAALKNLHPEACGESSCVKGGVAVMFYTSLCLYALGMGGVRGSMTAFGADQFDEKEPNEAKSLATFFNWLLLSSTLGSVVGVTGVVWVSTQKAWHWGFFIITLSSSIGFVTLALGKPFYRIKVPGESPILRIIQVIVVAFKNRKLPLPETNEQLYEVYKDVTLEKISHTNQIRFLDKAAILQENSEPQQPWNVCTVTQVEEVKILTRMLPILASTIVMNTCLAQLQTFSVQQGNIMNLKLGSFTVPASSIPVIPLIFLCTLIPIYELFFVPFARKITNHPSGITQLQRVG…
	PsNPF4.12 (New)	Psat1g193440		601	MDKSGFVDMKLESQLNLVDENKVDWKGRSALKFKYGGMKVALLILVTFGLENLGTFALAVNSVPYFNGIMHYELEDAANMLTNYMGVSYILSILVAVVADTWIGRYKSVIFSGFFEFLGLALLTAQAHYPSLQPRICNINDATAHCKTPSRGQEALLFLGLYLLAFGSAGTKAALPSHGADQFDETDPKEAKQMSTFFNTLLLAVCLGGSVSLTFIVWIQINKGWDWGFGIGTIAIFIGTIIFASGLPLYRIQVVKGTSGLIEIIQVYVAAIRNRNLPLPEDPTELYEIEQDKETAEEIEFLPHRDIFRFLDRAAINSEPDIQLEKSQAPSTSPWKLCRVTQVENAKIILSMVPIFCCTIIMTLCLAQLQTFSIEQGYTMDTSFTKHFHIPPASLPIIP…
	PsNPF4.13 (New)	Psat4g020560		595	MDSKDDSKVKDVEYQEVNYPKQGGYRATYFIFGMMLLDNIGFVANMASLVLYFLFVMHFDSSGSSTTTTNFLGTTFLLTVVGGFISDTYMNRLNTCILFGIIQLLGYALLVIQSRDEKLQPELCGEESCLHGRKAWLFYASIYLLALGGGGIRGCVPALGGDQFDDKNPKERVQLASFFNWFLFSITIGASLGVTFVVYVSTEFDWYKGFLISLSCSSAAIVCIVAGKRFYRTRIPGESPLLSILQVLVVAVKNWRVKVPDNSEELYEIESHKSTLKKKLIPHTTQFRVLDKAAILPEAKEAIKWKVCTVTQVEEVKILTRMMPVLLSTIIMNTCLAQLQTFSVQQGTFMNTFIGTFNIPAASIPVIPLVFMTLLIPVYEFAFVPIVRKFTGHPNGITE…
	PsNPF4.14 (New)	Psat1g158440		417	GLLMLTYQTQNPNLQPLENKTPSYIQALYLYTGLYSVAIGIGGIRSTLAVHGADQLDQTNKSLISSYFSWYFFSICIGGIFATSVMVSLEQKYGWSTSFIIMIFLSTLALCVLLSGFSFYRYRRPAGSPMTRVVQVLVASMKNTKVSTTENLNHDITEQLLTKEQSHDKFKFLNKALMDQNISVAQVKETKTFIGLLPIFLTAIMMNCCVAQLLTFSIQQGNLMNRKILDVIIPTQCLALAPLIISLTFIILLEQSKRMNKNNGTTTNNKIYQPLFRMRMGLALVSISMFVSSIIEYKRLEAFKKGNALSVFWLLFQYILLGLADTFTVGGMLEFFYLEAPESMRSISTSLSWCSNSMGMFVSSLLVTTCNSVSGRFGRKWFGGKDLNDSRLDLFYALC…
	PsNPF4.15 (New)	Psat2g124840		269	MVMELEAPQMTRWEGYIDWRNKPAFRGRHGGMLAASFVLVVEILENLAFLANASNLVLYLKEYMHMSPSKSANNVTNFMGTSFLLALLGGFLSDSFLTTYHVYLISALIELLGLIILTIQAHVPSLKPSKCNGSSQCEEVNGGKSALLFSGLYLVALGVGGIKGSLPVHGGEQFDESTPNGRKQRSTFFNYFVFCLSCGALIAVTFVVWVEDNKGWEWGFAISTITMFLSIPVFLAGSTTYRNKVPSGSPLTTILKVILRNLKLKVYLI-
	PsNPF4.16 (New)	Psat2g124800		233	MLNSCLAQLSTFSVEQAATMDTKLFSTFKVPPASLPVFPVLFLMILAPIYDHIIIPYARKVTKSETGITHLQRIGIGLILSIIAMAIAAIVEIKRRKISSDFNDAATENNPLPISFLWIGFQYLFLGSADLFTLAGLLEFFFSEAPSSMRSLATSLSWASLAMGYYLSSVIVSIVNSVTGNGDHKPWLSGSNLDDYHLERFYWLMCVLSGLNFLHYMYWAARYNYRGRGNGEE-
5	PsNPF5.1	Psat5g131680		479	MTLLTIAVSLKSLKPTCTNGVCNKASTSQVAFFYIALYTMAIGAGGTKPNISTFGADQFDDFNPREKELKASFFNWWMFTSFLGALIATLGLVYIQENLGWGLGYGIPTAGLLLSLVIFYIGTPIYRHKVRTTKSPARDIIRVLIAAIKNRKLQLPSNPSDLHEYEMEGNVGRGKRQVYHTPTLRFLDKAAIKKDPTTGSSRVPMTVNQVEGAKLIFGMLLIWLVTLIPSTIWAQINTLFVKQGTTLDRNLGPDFKIPAASLGSFVTLSMLLSVPMYDRLFVPFMRQRTGHPRGITLLQRLGIGFSIQIIAIAIAYAVEVRRIHVIKANHILGPKDIVPMSIFWLLPQYVLIGIADVFNAIGLLEFFYDQSPEDMQSLGTTFFTSGIGVGNFLNSFLVT…
	PsNPF5.2	Psat6g124520	4	594	MEDGKVVKEEEYTEDGTVNLKGKPVLRSKTGGWKACSFVVVYEIFERMAYYGISSNLILYLTKKLNQGTVTASNNVTNWVGTIWITPILGAYVADAHLGRFWTFLIASTIYLSGMSLLTLAVSLPSLKPPKCIEIDLTKCKRASTLQLAVFYGALYTLAIGTGGTKPNISTIGADQFDDFHPKEKSHKLSFFNWWMFSIFFGTLFANTVLVYVQDNVGWTLGYALPTLGLAISIMIFLAGTPFYRHKLPAGSTFTRMARVIVAALRKRKVPIPNDTKELYELDMVEYAKKGSNTYRIDSTPTLRFLDKACVKTGSTSPWMLCTVTHVEETKQMLRMIPILVATFVPSTMIAQINTLFVKQGTTLDRHIGSFKIPPASLGAFVTLSLLVCVVLYDRFFVR…
	PsNPF5.3	Psat3g055360		591	MAMVGENGLARGSEDYTQDGTVDLKGRPVLRSNTGRWRACSFIVGYEMIERMAYYGIASNLVLYLTKKLHEGTVKSSNHVTNWAGTVWIMPAAGAYIADAYLGRYWTFVISSAIYFLGMCLLTLTVSLPTLKPPPCATGIADKDCQRASSLQIGIFFFALYIIAAGTGGTKPNISTIGADQFDEFEPKEKSQKLSFYNWWVFYILIGTIFAQTVLVYVQDNVGFALGYGIPTIGLGVSILIFVLGTPLYRHRLPSGSPLTRMVQVFVASMRKWKVNVPIDSKELHEVTLEEYTSKGRYRINHSSSMRFLDKAAVKTGQTSPWMLCTVTQIEETKQMAKMIPILITTCIPSIIIAQTTTLFIKQGTTLDRSMGPHFEIPPACLIAFVNIFMLISIVMYDR…
	PsNPF5.4	Psat6g202240	3	493	MCLLTLSVTLTCLKPPKCHEMDVTKCEEASTLQLVVFYVALYVIAVGTGGTKPNISTIGADQFDDFYPKEKGLKLSFFNWWMSCIVMGSLFAFTVIVYIQDNVSWSLGYALQTIGFAISIITFLAGTPFYRHKLISGSPIISIAKVIVAAIRKWSVIVPQDPKELYELSLEEYTKKGKFKIDPTTTFRFLNKACVDTGSSTSSEWKICPITQVEETKQILTLIPIWVATFIPSAMIAQMNTLFVKQGTTLDRAIGNFNIPPSSLNAITILTMIITYILYERFFVRIMQKLTKNPRGITLLQRMSIGFMIHIVIMIVAYTAERHRLCVAKQYGVIENGGQVPLSIFVLAPQFVLMGIAEALLEGAKIEYFYDQAPESMKSLGASYSLTTTGIGSFLSVSL…
	PsNPF5.5	Psat3g055560		605	MAMVEEKGSATREHDYTQDGTVDIKGRPVLRSETGRWKACSFIVGYEVFERMAYYGIASNLVIYLTSKLHEGTVESSNNVSNWSGSVWMMPLVGAYIADAYFGRYWTFVIASCIYLLGMCLLTLAVSLPSLKPPQCAQGIADNNCPKASPLQKGVFFLALYIIAVGTGGTKPNISTMGADQFDEFEPKERSYKLSFFNWWFFSIFLGTLFSNTFLIYIQDNVGWTVGYGLPTIGLGISILVFLVGTPLYRHKLPSGSPITRMLQVYVAAIRKWKSCIPEDPKELHELNMEDYDCKGRNRIDHSSSLSFLDKAAIKTGQTSTWMLCTVTQVEETKQMTKMIPILITTIVPSTLIVQATTLFIKQGITLNKSMGPHFDIPPACLTAFITIFMLISIVVYDR…
	PsNPF5.6	Psat3g055440		597	MAVVEEKGQEKYTEDGTVDLQGRPVLRSKSGRWKACSFIVVYEIFERMAYFGIATNLVVYLTNKLHEGTVESSNSVSNWSGSVWLMPIAGAYVADAYLGRYWTFVISSCIYLMGMCLLTLAVSLPSLRPPQCAQGILDQDCPKASPLQKGIFFLALYIISIGTGGTKPNISTLGADQFDEFDTKERFYKLSFFNWWVSSIMIGVLFSSTFLVYIQDNVGWAFGYGLPTIGLAISITIFLVGTPFYRHRLPSGSPMTKMLQVFVAAMRKWKTLVPKDPNELHELSIEEYACSYKNKIDHTFFLRILDRAAVKTGETSSWRLCTVTQVEETKQMIKMIPILILTIIPNTMLGQSFTLFIKQGITLDRRMGHNFEIPPSSLVTFIVVFMLISIVAYDRVFVP…
	PsNPF5.7	Psat3g055480		596	MEVSEEKGPLEDYTKDGTVDSQGRPVLRSKTGRWKACSFLVGYELFERMAYYGISTNLVVYLTNKLHQGTVESSNNISNWGGSVWLMPLAGAYVADAYLGRYLTFVIASGIYLMGMCLLTLSVSLPSLRPPECAKGVAFENCPKASPLQKGVFFLALYIIVLGTGGTKPNISTMGADQFDDFDPKEKSHKFSFFNWWYFSILIGVLFSTTFLVYIQDNIGWTLGYGLPTIGLAFSILVFLLGTPYYRHKLPQGSPMTRMLQVFVAAVRKWKVCVPEDTNELHELSMEEYACNGRNRIPHTSFFSFLDKGAIKTGQSSPWMLCTVTQIEETKQMAKLIPISIFTIIPSTLGMHLFTLFVKQGMTLDNRVGHHFNISPGSLLSITIIFTLIWIPMYDRIFV…
	PsNPF5.8	Psat4g144560		590	MISHSNSPYQNPQPNQIMADSPSKSKTNSLIHHTTTKKGGWNAAIFIIFVEFAERFAYQGLASNLINYLTKFLNEPTTTAVKNVNTWVGVSSLFPLLGGFVADSYLGRFNTILLSSLIYLVGMVFLTLSVSVLRHKTLFFFALYVLSIGEGGHKPCVQTFAADQFDDDTPEEKDAKSSFFNWWYLGIVAGSTAAVFIPVYLQDNVGWGVGLGVLAGVLAMALAIFLLGIKRYRKEGPTGSPFTRLAQVFVAASRKWRVQDTIGTNNFCYSQEDKHEPHHHHPLQPKYHTLLHTRQYRILDKAAIIDEVDASSKTRNPWRLCSVTQVEEVKLVLRLIPIWLSCLMFTVVQAQGHTYFIKQGGTLVHTIGSNFQFPPASLQGLVGVTILFAVPIYDRVFVP…
	PsNPF5.9	Psat5g221320		559	MAMEENKRDVKDQPTKPKRGGWHAAIFIIVMEAAEQFANIGLSTNLILYLNKALNEPLTEAAKNRNTWVGVSSIFPLLGGFIADSYLGRFNTIIIASLIYLLGMIILTISVSILKNKKLFFVALYILSVGDGGHKPCVQTFAADQFAEDTEEEKDAKRSFFNWWYMSIVIGSVFAVFVIGYLMENVSWTVGLVVLASMLAVALSIFLLGMKRYTKERPTGSPITSIARVFVAASRKWRVKNTPGRDNYCYGYDHDSLHTSESSTAIQTLAHTDQFKFLDKAMMIDEQDTSRKEINPWRLCSMTQVEEVKLVIRLIPIWLTCLMFTVVQSQLGTFFVKQSSTLDRSTVQHFLIPPSALQGLVGIVILFALPIYDKVFVPFARKITGHHSGITVLQRIGVG…
	PsNPF5.10	Psat5g221360		562	MEESNGGVQIQPTKTKKGGWHAAIFIIIMEAAEQFANIGLGSNLILYLNKALNEPLTEAAKNRNTWVGVSSIFPLLGGFIADSYLGRFNTIIIASLIYLLGMILLTLSVSIVKNKKLFFTALYILSVGDGGHKPCVQTFAADQFAEDTIEERDAKRSFFNWWYLAIVIGSVFAVFVIGYLMDNVSWAIGLLVLASMLAIALVVFLLGTKRYTKESPKGSPITSIVRVFVAAARKWRVKDTRGPDSYWYGYDHDSFHHSRSTSISRSLAHTKQYRFLDKAMIIDEHDDASRKIVNPWRLCSMTQVEEVKLVIRLIPIWLSCLMFTVVQSQLGTFFTKQTSTLDRSIGQHFVIPSAALQGFVGVVILFAVPVYDKVFVPFARKITGHHSGITVLQRIGVGL…
	PsNPF5.11	Psat3g133200		587	MEKMNPEIKADDDMKWVHDSSVDHKGRVPLRASTGSWKAAFFIIAIEFSERLSYFGIATSLVLYLTKVMHQDLKTAARNVNYWAGVTTLMPLFGGFIADAYLGRYSTVFASSIAYLMGLILLTLSWFLPSLKPCDHTMTCNEPRKIHEVVFFVAIYSISIGTGGHKPSLESFGADQFDEDHVEERKQKMSFFNWWNCALCSGLILGVTLIVYIQDNVNWGAADVIFTGVMAISLVVFVIGRPFYRYRVPCGSPLTPMLQVLVAAISKRKLPYPSNPDQLYEVPKSHGNKKKFLCHTKKLRFLDKAAIIENDGNLTEKQSPWKLVNVTTVEEMKLIINMIPIWVFTIPFGVSVAQTSTFFIKQSATMNRKIGKSFELPPASIFTVAALGMIISVAIYDKI…
	PsNPF5.12	Psat7g241560		588	MKKNNHDDDEIKFVHDSSLDYHGKIPLRSSTGSWKASFFIIAIEFSERLSYFGIATNLGMYLAKVLHQDLTTAIKNVNYWAGVTTLMPLFGGFFADSYLGRYTTVIGSCIIYLMGLVLLTLSWFLPSLKPCAHTSTCTKPRKIHEVFFFLAIYLISIGTGGHKPALESFGADQFDDDHIKERRQKMSFFNWWNCGLCSGLILGVTVIGYVQDHVSWGAADVILLGVMAFSLVIFVIGRKVYRYRMPNGSVLAPMFQVIVAAISKRKLPHPSSPSQLYEVSKAEDNNGRFLAHTKKLKFFDKAAIIENEGNLAKEQSPWRIATVTKVEEMKLMINMIPIWIFTLPFGMCAAQTQTFFLKQGQIMDRKLGHNFEFPPSSIFTISAIGMIISVALYDRFLVP…
	PsNPF5.13	Psat5g125120		562	MEQDMEKRKGDRSEQSNEEKWVYDGSFDYKGRVPLRASTGAWKASLIVIMVEISERMSHYGISMNLITYLTEVIHEDLKTAAKNVNNWYGVTTLMPLVGGFVADAYTGRFYMVQLSSIIYMMGLCLLTMSQYIPSLKSCNTEICQRPRKVHEVVFFLAIYAKSLGTGGFRPCLQSFGADQFDDGHLEEMKKKLSFFNWWNFGLCFAVLISSTLIVYVQDVVNWGVSSLILTSFMAIAVITFWVGKPFYRYRKTEGNPLLPILQVLVAAIRKRGLCCPSNPDLLYQVPISDQSQGRLLSHTRRFRFLDKAAIIEEEYVEQEVNPWRLATLTRVEETKLVLNIVPIWITLLASGACGAQGTTFFVRQAAATDLNIGNGFKIPPASLNSVSAIGTLIGVPIY…
	PsNPF5.14	Psat5g125000		597	MDQVKENRKQDTREEENEQEKWVHDGSVDFKGKVPLRASTGVWIASLFVLTIEFSERVSFFGIAANLISYLTKVMHEDLKTAAKNVNYWTGTTTLMPLIGGFLADAYTGRFPMVLFSSLVYLMGLSLLTLSQYIPSLKPCNTKTCLQPRKLHEVVFFLSLYCISVGTGGHKPCLESFGADQFDEDHVEERKKKMSFFNWWSFALCFALLLGATVIVYVQDFVSWGAACLILTILMALCIIAFYVGKPFYRYRRPQGNTLKPILQVLVAAIRKRKLSCPSNPDLLYEVPKSDNSQGRLLSNTSNLRFLDKAAIIEDTQAPKKKNPWGLATVTRVEETKLILNIIPIWLTSLTTGICLAQGSTLFVKQAASMNLKVNDSFSIPPASVSSASAFGILIFVPI…
	PsNPF5.15	Psat5g125080		588	MDQEKEKRKQSSREEKSEQEKFVYDGSVDYKGQVPRRASTGVWIASLFVLTIEFSERVSFFGIASNLISYLTKVMHEDLKTAAKNVNYWTGTTTLMPLIGGFLADAYTGRFPMVLFSSLVYLMGLSLLTMSQYIPSLKPCNTKTCLQPRKLHEVVFFLSLYCISLGTGGHKPCLESFGADQFDEDHVEERKKKMSFFNWWNFALCFALLLGATVIVYVQDFVSWGAACLILTILMALCIIAFYVGKPFYRYRRPQGNTLKPILQVLVAAIRKRKLSCPSNPDLLYEVPKSDNSQGRLLSNTNNLRFLDKAAIIEDTQIDKKRNPWRLTTVTRVEETKLILNLIPIWLTSLTTGICLAQGSTLFVKQAASMNLKLSDSFTIPPASVSAAAAIGTIIFVPI…
	PsNPF5.16	Psat1g078400	2	543	MAGGHKQKRLSNSCILLIVIAGIERFAFKGVASNLVTYLTDVVNLSNSSAAKMVNSWVGFTSIMPLLVAPIADAYWEKYSTIMSSSFLYVMGLAALTTTALARSWHHKNRTMSSSFLSLSLYLISLGQGGYNPSLQAFGADQLGEEEDLPCGTDDTSSNKKALFFQWWYFGVCAGSLMGVTFMSYIQDTFGWVLGFAIPAISMLLSILIFSSGSSIYSYKKQDDDDGLQDKKPFMNMFQTIKASALKCFHCEITLPNDKSEGVELELQETPLCRENSESIKVMDKDSKISMCLLPNVKVVIKLLPIWAMLLMFAVIFQQPATFFTKQGMTMKRNIGKNFKIPPATLQSAITLSIILLMPLYDKVFIPFAQLITRQEKGINKMQRMGIGMVLSIIAMVIA…
	PsNPF5.17	Psat7g259080		570	MENSNQLFLEPEITLVDGAVDYSGQPALRSKSGYWRSAWFIIGVEVTERVSYYGIQGNLISYLTGPLKQTTAIAAKNVNVWSGTASLLPLLGAFVADSFLGRYRTIIIASFIYILGLSLLTLSATIPSLAKSKCQVDSKFILCSKNSQVILFFISLYLVAIGQGGHKPCVQAFGADQFDEQHPKEHRARSSFFNWWYFTMVAGATVAIAILAYIQDNYSWVLGFGIPCIVMTFGLLVFLLGTMTYRYNIKENETSPFLRIGRVFVAAARNWQTTLSSTSIEDECDGMLHCQSSKQFNFLNKALLTPKGSKEGNTCSLVEVEEAKAILRLVPIWATSLVYGIIFAQVSTFFTKQGNSMERTIFPGFHVPPASLQSINGVAIILFSPIYDRIFVPIARAIT…
	PsNPF5.18	Psat1g003400	2	549	MAGDSETPLLLESDTIDGVVDFKGRPVLRSTSGGWKAASFIISVEVAERFAYYGITSNLINYLTGPLGQSTVTAAENVNIWSGTASLLPLLGAFLADSFLGRYRTILIASLIYILALSLLTLSATLPSNVGGQAILFFFSLYLVAFAQGGHKPCVQAFGADQFDINHPRERRSRSSFFNWWYFTFTAGVFVSVSVLNYIQDNVGWVLGFGIPCIGMLIALSLFLLGTWTYRFNIPEDQQRGPFSRIGRVFFVALANFQTTQQEPPPSPSLPHQPSQQFSFLNKALIASDGSKENGKACSVFEVEEAKAILRLVPIWATSLIFAIVFSQSSTFFTKQGVTLDRKILPGFYVPPASLQSIISLSIVLFIPVYDRIIVPIARTFTGKPSGISMLQRIGTGMF…
	PsNPF5.19	Psat0s4032g0040		568	MENSNEVSLEAELTDLVDDAVDYTGQPAVRSKSGYWRSAWFIIGVEVAERISFYGIQGNLISYLTGPLNESTAIAAKNVNVWVGTASLLPLLGAFVADSFLGRYRTIILASLIYIMGLVMLTLSAMLPSLTKSKCQVDSKFILCSQHSQVILFVISIYLVAIGQGGHKPCVQAFGADQFEEQHPKEHRARSSFFNWWYFTVLAGCTLIISILNYIQDNYSWVVGFGIPCIVMTIGLLVFLCGTKTYRFNIKDNDKSPFLRIGRVFTAAIRNWRNTLSNTSIDDGMLLRQGSEPFSFLNKALLTPKGSKEGNTCSLVEVEEAKAMLRLVPIWTTSLVYGIVFAQVFTFFTKQGKSMKRTIFPGFDIPPASLQSINGIAIILFSPIYDRIFVPAARAITGK…
	PsNPF5.20	Psat7g145840		552	MENPNEILLEAAVDYRGQAAVRSKSGYWTSAWFIIGVEVAERISFFGIQGNLISYLTGPLEQTTATAAKNVNVWSGTASLLPLLGAFVADSFLGRYRTIVLASLIYILGLGLLTLSAILPSLTICSPQSQVILFFTSLYLVAIGQGGHQPCVQAFGADQFDEQHPKEHRDRSSFFNWWFFATATGCILTLPILNYIQDNYSWVLGFGIPFLVMIIALIVFLMGTVTYRFKINDNDKSPFLRIGRVFVAAIRNWQDTLIYMDIKEECDGMLPHQRSQQFNFLNKALLTPKGSKRENNCSISEVEEAKAILRLIPIWTTSLVYGIVHAQISTFFTKQGKSMDITIFPGFDMPPASLQIINGVSVVLFSPIYDRIFVPITRAITGKPSGITMLQRIGTGIFI…
	PsNPF5.21 (New)	Psat3g055400		600	MEMVEEKGQQGYSQDGTVNLQGKPVLRSNTGGWKACSFIIVYEVFERMAYFGIASNLVVYLTNKLHEGTVESSNNVNNWSGSIWMMPLVGAYVADAYLGRYWTFVISSFIYLLGMCLLTLAVSLPSLSPPQCAQGILDQDCPKASPLQKGIFFLALYIISLGTGGTKANISTLGADQFDEFDTKERSYKLSFFNWWFFSIFVGVLFASTFLVYIQDNVGWAIGYSLPTIGLIVSIIIFLVGTPFYRHKFPSGSPITKMLQVFVAATRKWNARVPEDPKDLHELSMEEYACNARNKIDHTSFLRILDKAAVKTRETSSWMLCTVTQIEETKKMIKMVPILILTIIPSTMVMQTFTLFIKQGTTLDRRMGPHFEIPPASLIVFIVIFILISLVIYDCAFIP…
	PsNPF5.22 (New)	Psat7g144960		287	MISTLRLVDVLAYVFLNKALLTPKGSERENNCSISEVEEAKAILRLIPIWTTSLVYGIVHAQISTFFTKQGKSMDITIFPGFDMPPASLQIINGISIALFSPIYDRIFVPITRAITGKPSGITMLQRIGTGIFISIFTIVIAAFVEIKRLKIVQEYGLVDDPNAIVPMSIWWLVPQYFLFGVSGVFTMVGLQEFFYDQVPTELRSMGLALYLSIVGVGSFLSGFLISLTQILSGKYGNESWFCDNINKAHFDYFYWLLAGLSVVGFTLFVFFAKSYTYNHKGSITHA-
	PsNPF5.23 (New)	Psat0s1306g0040		245	MLRLVPIWTTSLVYGIVFAQVFYILHKQGKSMKRTIFPGFDIPPASLQSINGIAIILFSPIYDRIFVPAARAITGKPSGITMLQRIGTGIFLSIFTMLIDVFVENKRLRITQEYGLIDDPNAIVPMSLWWLVPQYSLLGVSEVFIMVGLQEFFYDQVPNELKSMGLALYLSIVGVGSFLSGFLISLIENLSGKDGDESWFRDNINKAHFDYFYCLLAGLSMVGFTLFLYFAKYYTYNHKGAITQS-
	PsNPF5.24 (New)	Psat7g144920		227	MDILVFPGYNIPPTSLQIINGVRVVLFSHIYDRIFVPITRAITGKPSEITMLQRIGTVIFISIFTIVIATFVEIKRLKTTQEYGLVDDPNAIVLMSIWWLVPQYFLFGVSEVFTMVGLQEFFYDQVPNELRSMGLALYLSIVGVGSFLSGFLISQIQNLSGKDGHESWFCDNINKAHFGYFYCLFAGLSVVGFTFLFTLQNHTLIITKVPSHMHNHCLFFLLCHICK-
	PsNPF5.25 (New)	Psat7g145760		96	GLGSLTLSAILPSLTICSPQSQVILFFTSLYLVAIGQGGHQPCVQAFGADQFDEQHPKEHRDRSSFFNCWYFATATGCILTLPILNYIQDNYSRVL-
6	PsNPF6.1	Psat3g207040		637	MDSCEIKSPQAPQQGTPTPCMNRKKLGIYFIESEDRRMALGRGYTRGSTPVNIHGKSIVDLSKTGGWIAAFFIFGNEMAERMAYFGLSVNMVAFMFYVMHRPFASSSNAVNNFLGISQASSVLGGFLADAYLGRYWTIAIFTTIYLAGLTGITICATMSIFVPNQENCDQLSLLLGNCEPAKPWQMTYLYTVLYITAFGAAGIRPCVSSFGADQFDERSKNYKSHLDRFFNLFYLSVTIGAIIAFTAVVYVQMKYGWGSAFGSLAIAMGISNMLFFIGTPLYRHRLPGGSPLTRVAQVLVAAYRKRNESFDSSEVIGLYEVPGRKSAIKGSQKIDHTDDFRFLDKAALQLKQDGPNPNPWNLCTVTQVEEVKILIKLLPIPACTIMLNVILTEFLTLSV…
	PsNPF6.2	Psat4g038520	2	579	MEKKMSWTVGDAVDYKGFPADRSKTGGWVPAALILGIEIVERLSTMGIAVNLVTYLMGVMHLPSSTAANTVTDFMGTSFLLCLLGGFLADSFLGRFKTIGIFAAIQTLGTAALAISTKLPRLSPPPCHAGEICKPANGIQMGILYLALYLIALGTGGLKSSISGFGSDQFDEKDEKENSQMTYFFNRFFFFISLGTLAAVTVLVYIQDKVSRSWAYGICSVSMIIAILVFLSGTKRYRYKKSLGSPIVHIFQVIVAAVKKRKMELPYNVGSLYDDTPEESRIEHTDQFRFLEKAAIVAEGDFDKDLYGSGPNPWKLCSLTRVEEVKMMVRLLPIWATTIIFWTTYAQMITFSVEQASTMQRNVGGFEIPAGCLTVFFVAAILITLAVNDRIIMPLWKKM…
	PsNPF6.3	Psat0s3925g0040		593	MSTLPQTQGQTIQDAWDSKGHPADRSKTGGWTSSAMILGSEACERLTTMGIAVNLVTYLTGTMHLGNASSANTVTNFMGTSFMLCLLGGFVADTFIGRYLTIAIFATVEAIGVTILTISTIIPSLRPAKCAQNIHNSCEPANNLQLTVLYTALYVTALGIGGLKSSVSGFGSDQFDDSNEGERKQMVKFFNWFFFFISIGSLTAVTVLVYIQDHVGRDWGYGLCACAIVVALLVFLSGTKRYRFKKLVGSPLTQIAVVFVAAWRKRKLELPYDSSLLYNLDDVEDHDMRKKKQMLPHSKQFRFLDKAAIKEPKTDGNEINMARKWNLSTLTDVEEVKLVLKMLPIWATTIMFWTVYAQMTTFSVSQATTLNRHIGKSFQIPPASLTAFFIGSILLTIPI…
	PsNPF6.4	Psat2g178360		589	MSTLPTTQGKTVPDASDYKGRPADRATTGGWSAAAMILGGEVMERLTTLGIAVNLVTYLTGTMHLGNAVSANVVTNFLGTSFMLCLLGGFLADTFLGRYLTIAIFAVVQAIGVTILTISTIVPSLHPPKCTIDSKSPCIQANSKQLLVLYLALYVTALGTGGLKSSVSGFGSDQFDDSDKDEKKGMIKFFSWFYFFVSIGSLAAVTVLVYIQDNKGRDWGYGICAVAIVVAVLVYLSGTRKYRIKQLVGSPLTQIAVVFVAAWRKRRMQLPSDSSLLYEEDDKKLITVLQICTIKMNTFLDKAAIKVVESGSEITIKEKWYLSTLTDVEEVKLVIRMLPIWATTIMFWTIHAQMTTFSVSQATTMNCHIGKSFEIPAASMTVFLIGTILLTVPFYDRFI…
	PsNPF6.5	Psat2g178520	3	581	MDTLPTTQEKTVSHAFDYNGFPAERSKTGGWTSASMILGGEIAERLATLGITVNLVTYLTGTMHLGNADSANIVTNFVGTSFMLCLFGGFLGDTYVGRYLNIAVFAAVQASGVALLTISTIIPSLSPPKCMEHTPCVQANTKQLMVLFAALYVTALGTGGLKSSVPGFGSDQFDATDKQEKKQMMKFLNWFYFFANIGSLMAVTVLVYIQDHQGRDWGYGICVCAIVLALVVFLCGTRKYRYKKPVGSPLTQIAVVFAAAWRKRNLLLPSDSAELFTEDDNILHEPPRIKQRLPHSKQFRFLDKAAIKDFESVGGIMKINKWYLSTLTDVEEVKLVLRMLPIWASTVVFWTVQVQMMTLSVSQATTMDRRIGKSFQIPAASMTSFLIGTILLTIPFYDH…
	PsNPF6.6	Psat4g071440		588	MNTLPQTQGQTVPDAWDSKGRPADRSKTGGWATSAMILGSEVCERLTTMGIAVNLVTYLTGTMHLGSAASSNIVTNFVGTSFMLCLFGGFVADTFIGRYLTIAIFGTIEAIGVIFLAISTKIPSLHPPTCSQNSPNSCKPANSLQLAVLYAALYILALGIGGLKSSVSGFGSDQFDDSNEEEKEQMVKFFSWFYFFISMGSILAVTILVYIQDHLGRAWGYSICAGAILAALLVFLSGTKKYRYKKRVGSPLTQIAAVFVAAWRKRKLELPSDSSLLYNVNDLKDQDVTNKKQMLPHSKQFRLLDKAAIKDPNTDVNVVRKWDISTLTDVEEVKLVIRMLPIWATTIMFWTVHAQMVTFSVSQATTLKRHIGKSFQIPAASLTAFLTGSILITIPIYDR…
	PsNPF6.7	Psat2g025760	6	583	MVHVASNGEEKGAEDNAAVDFRGRPVDKTKTGGWLAAGLILGTELAERICVMGISMNLVTYLVGDLHLDSAKSATIVTNFMGTLNLLGLLGGFLADAKLGRYVTVVIFASIAAMGVCLLTLATTIPSMLPPPCSEVRRKHHECIPASGKQLALLFAALYTTAVGGGGIKSNVSGFGSDQFDTRDPKEEKKMIFFFNRFYFFVSIGSLFSVIVLVYVQDNIGRGWGYGISAGTMVVAVCILLCGTPFYRFKKPQGSPFSVIWRVLFLAWKKRTLPLPSEPCLLHGYAEAKVPHTDRLRSLDKAAILDETNSNDENKQSPWLVSTMTQVEEVKMVIKLIPIWSTCILFWTVYSQMNTFTIEQATFMNRKVGSLDIPSGSLSAFLFITILLFTSLNEKLTVP…
7	PsNPF7.1	Psat6g242600		582	MEENENYQEKSESVNEMKTGGTKVATLLLVNQALATLAFFGVGVNLVLFLTRVLGQDNAQAANNVSKWTGTVYMFSLIGAFLSDSYWGRYLTCTIFQLFFILGLALSCFSSWRFLINPSGCGDGHISCNPTSFGVNIFYFSIYLVAFGYGGHQPTLATFGADQYDEKNPKERSSKLAFFCYFYFSLNVGSLFSNTVLVYYEDSGKWTMGFLVSLISAIIAFLTFLSGSPQYRYFKPSGNPIVRVAQVFTAVARKWDVVPAKAEKLFELDGSKSAIKGCRKILHSDDLQLMDKAATITENDDEDEETRNNPWRLCTVTQVEETKCVLRMLPIWLCTISYSVVFTQMASLFVEQGDAMNSKIGDFRMPAASMSVFDICSVLICTAIYRQYLVPLTGRMMGN…
	PsNPF7.2	Psat6g142760		591	MEPAGFVAPNAVNSADIEVVEATRENDNHGEVADVKKIKGGWKTAYILLANQALATLAFFGVGVNLVLFLTRVLRQDSADAANAVSLWTGTVYMFSLLGAFLSDSYWGRYLTCTIFQLFFVLGLGLLSLTSWLFLIKPEGCGGEHTTCMEPTSWGVRLFYLSIYMVAFGYGGHQPTLATFGADQFDDKTIKNNNSREAFFSYFYFALNVGSLFSNTVLVYYEDSGMWTMGFGVSLASAVIALISFLAGYRRYRYVQACGNPIVRVIQVFVATARKWKVQPAKGGQLYEVDGVESAIKGSRKIKYTNEFRFMDKAATLTKEGNESESQWRLCTVTQVEEAKCVLRMMPVWLCTIIYSVVFTQMASLFVEQGDVMNNEIGKFHLPAATMSVFDIFSVLLST…
	PsNPF7.3	Psat4g078440		592	MACLEVCKEGKFKEETEELTLDGSVDWHGRPAIRAKSGSWFAGTIILLNQGLATLAFFGVGVNLVLFLTRVLGQNNADAANNVSKWTGTVYIFSLVGAFLSDSYWGRYKTCAIFQGIFVLGLVSLSISSYFALLRPKGCGNGTIECGKHSSFEMGMFYLSIYLIALGNGGYQPNIATFGADQFDEDHSKESYSKVAFFSYFYLALNLGSLFSNTILGYFEDEGLWALGFWASAGSAFLALVLFLVGTPRYRHFRPAGNPLSRFCQVLVAASRKLGVQMTPNGEDLYVTDEKESATNSNRKILHTHGFKFLDRAAFITSRDLEVQKGGQTNPWYLCPITQVEEVKCILRLLPIWLCTIIYSVVFTQMASLFVEQGAAMKTTISRFKIPPASMSSFDILSV…
	PsNPF7.4	Psat2g173680		601	MSCLELELSKENKFKEESESQELTLDGSVDFYNRPAIRAKSGRWSAATIILLNQCLATLAFFGIGVNLVVFLTRVVGQSNAEAANNVSKWTGTVYIFSLVGAFLSDSYWGRYKTCAVFQVIFVIGLMSLSLSSYLFLIKPRGCGNESIPCGKHSSLEMGMFNLSIYLIALGNGGYQPNIATFGADQFDEEHSREGHNKVAFFSYFYLALNFGQLFSNTILVYFEDEGMWALGFWLSAGSAFAALILFLVGTPRYRHFKPSGNPLARFCQVLVAASRKVKVQMPSNGEDLYNMDTKESSANMNRKILHTHGFKFLDRAAFISSRDFDNQKCASYSPWRLCPVSQVEEVKCILRLLPIWLCTIIYSVVFTQMASLFVEQGAAMKTTVSNFKVPPASMSSFD…
	PsNPF7.5 (New)	Psat0s3070g0120		590	MASRVFEIDSHEEENTNLCTKDGSVDCYGKSAIKSKTGGWRSASWLLVNQFLVTLAFTGVEVNLVLFAKLVLRQSNAESANTFSTWMGTTYFFSLVGAFLSDSYLGRYLTCIIFQLVLNIGLVLLSLSTHFLLLKPQGCGKIGFLCEPQSPLHVAILYISIYLVALGNGAADPALATFGSDQFDEEEPKEEKSKSLFFSYFYVALNLGSLAAETVLAYIETSGNWVLGFWICFGCGGFSFLVFMAGSLRYRHMKTTRNPILRFAQVFVSSVKKIKLQVPANGDGLYDVREGDDRKMHHTEGLKFFDRAVIISTKEEHKLLEKSENPDPWNLCTVTQVEEVKCILRLLPVWLCTIFSSVVFIQMLSLFVEQGSTMNRKFYKFEIPPASMTAFDIISTSLF…
	PsNPF7.6 (New)	Psat7g232000		585	MDGNEEDSSSQVIEVYEHEEKCINSCTGDGSVDFYGKPALKARTGGWKSASLLLVNQGLIALAFSGVEANLVLFSKLVLKQTNVEAASTFSIWMGTTYFFSLIGAFLSDSYLGRYLTCIIFQLVFIIGLVMLSLSAHFFFLKPHGCEQNGVPCESDIQNQFPLFYISIYLIALGSGVSDPALPTLGADQFDEEEPDEQRSKTLIYGYFYVALNLGSLIAETVLAYIAITGHWVMGFWICTGCACVSFVVLLSGTLRYRHYKSFGNPFSKFTRVIVSFLRKVKSQIHSIGEGFYGIQRDDDTRVRRIHHTNGLRFFDRASMVSDDATEMLLGKGQKSYTWNFSSVTQNEGVKYILRVLPIWFCTIFSSSVFIQMRSLFVEQGSTMDRTFFKFQIPPASMT…
8	PsNPF8.1	Psat0s4602g0080		569	MAEDDDIYTQDGTITIRKKPANKKKTGNWKACWFILGNECCERLAYYGMSTNLVNYLGERFNQGNAAAAKSVTTWSGTCYVTPLLGAFLADSYLGRYWTIASFSVIYVTGMILLTLSASAPGLKPSCDSNGCHPTSAQTAAMYLGLYLIALGTGGIKPCVSSFGADQFDETDEKERKKKSSFFNWFYFSINIGALIASSVLVWIQMNVGWGWGFGIPAVAMVLALISFFAGSYLYRLQIPGGSPLTRICQVLVAASRKLRLQVPDDKSLLHETIDVESVIKGSRKLDHTNNLRCLDKAAIETQSDRFLRVINPWRLCTVTQVEELKSIVCLLPVWATLIAFATVYSQMNTMFVLQGNTMDQHIGPHFKIPSASLSLFDTLSVIFWAPVYDRVIIPFARK…
	PsNPF8.2	Psat5g161760	5	523	MSTNLVLYFKERLHQHSATASKNVSNWGGTCYITPLIGAFVADSYLGRYWTIASFSIIYVIGMTLLTLSASVSGIKPTCQGKENCHATDLQSIVCFIALYLIALGTGGIKPCVSSYGADQFDDADEKEKEHKSSFFNWFYFSINIGALIASSLLVWIQDNVGWGWGFGIPAVAMAIAVVSFFSGTKLYRNQKPGGSALTRIVQVIVASIRKYRVEAPSDKSLLYEIADTESAIKGSRKLDHTNELRFFDKAAVLGQSDNLKDSINPWRLCTVTQVEELKSILRLLPVWATGIIFATVYGQMSTLFVLQGATMNTHVGNSSFKIPPASLSIFDTLSVIFWVPVYDRIIVPLARKFTGHKNGLTQLQRMGVGLFISIFSMVAAAILEVIRLRTVRKHDYYD…
	PsNPF8.3	Psat7g247760	5	575	MVDVVQKHDENEGDDLYTEDGTIDIRKRPANKKKTGNWKACSFILGNECSERLAYYGMSTNLVNYLHDQFGQDNATAAKNVNTWSGTCYLTPLLGAFLADSYLGRYWTIASFSCIYVIGMALLTFSAVAPGLKPPCDADGCHPTSGQTAACFIALYLIALGTGGIKPCVSSFGADQFDDNDVAEKKKKSSFFNWFYFSINIGALIASSVLVWIQMNVGWGWGFGVPAVAMVIAIIFFFIGSRWYRLQIPGGSPITRICQVIVAAFKKHGLKVPDEKFLYETTDSESNIKGSRKLEHTNELKCLDKAAVETESDQNRDVPSPWRLCTVTQVEEFKSVIRILPVWASLIAFATVYSQMGTMFVLQGNTMDQHIGPKFEIPSASLSLFDTLSVIFWAPVYDR…
	PsNPF8.4	Psat2g059640		562	MAEEEDIYTKDGTVDYLGNSANKRKTGTWRACPFILGNECCERLAFYGMSTNLVRYFKYQLHQHSATASKNAADWGGTCYITPLIGAFVADAYLGRFWTIFCFSILYVIGMTLLTLSASVPGIKPTCYTKDDCHATHEQSAICFVALYLIALGTGGIKPCVSSFGADQFDDADEVEKEHKSSFFNWFYFSINIGALIAASLLVWIQDNVSWGLGFGIPAVAMAIAVVSFFSGTRLYRNQKPGGSPVTRMCQVIVASIRKYHVDVANDETLLYETPETLSAIQGSRKLDHSNGLRFFDKASVLENSDDLKDSTNPWKLCTVTQVEELKAIIRLLPIWATGIIFATVYGQMSNYFVLQGETMNTHLGNFQIPPASLSIFDTLSVIFWVPIYDRIIVPTARK…
	PsNPF8.5	Psat7g086240	2	584	MGSVEDDSSRLEEALIQDEESKLYTGDGSVDFKGRPVLKKNTGNWKACPFILGNECCERLAYYGIATNLVTYLTRKLHEGNVSAARNVTTWQGTCYLTPLIGAVLADSYWGRYWTIAIFSMIYFIGMCTLTLSASIPTLKPAECLGAVCPPATPAQYAVFFIGLYLIALGTGGIKPCVSSFGADQFDDTDSRERVKKGSFFNWFYFSINIGALISSSFIVWIQDNTGWGLGFGIPALFMGLAIGSFFLGTPLYRFQKPGGSPLTRMCQVVAASFRKRNLAVPEDSSLLYETPDKSSAIEGSRKLQHSDELRCLDRAAVVSDDERKSGDYSNLWRLCTVTQVEELKILIRMFPVWATGIVFSAVYAQMSTLFVEQGTMMDTSIGSFKIPPASLSTFDVIS…
	PsNPF8.6	Psat3g173600		586	MGSIIDNDSSSLAEESLLQDEEIKKYTGDGSVDFKGRPVLKQNTGNWKACPFILGNECCERLAYYGIAKNLVTYLTRKLHQGNVSAARNVTTWQGTCYLTPLIGAILADSYWGRYWTIAVFSTIYFIGMCTLTLSASVPALKPAECFGSVCPPATPVQYAAFFFGLYLIALGTGGIKPCVSSFGADQFDDTDPQERVKTGSFFNWFYFSINIGAFVSSTLIVWTQENAGWGIGFGIPALFMGLAIGSFFLGTPLYRFQKPGGSPITRMFQVVVASFRKRRLVLPENSSLLYETPDKRSAILGSRKLEHSDELRCLDRAAIVSDAERESGDNSNLWRLCTVTQVEELKTLIRMFPIWAAGIVFNSVYAQLSTMFVEQGTLMDTSIGSFKIPPASLSCFDV…
	PsNPF8.7	Psat7g087440		584	MGSIENGSSLVEQSLLQDEDSRQYTGDGSVDFKGRPVLKLNTGNWKACPFILGNECCERLAYYGIGANLVTYLTHKLHQGNVSAARNVTTWQGTCYLTPLIGAVLADSYWGRYWTIAVFSAIYFIGMCTLTLSATVPALKPAECFSSVCPPATSAQYAIFFFGLYLIALGTGGIKPCVSSFGADQFDDTDPQERIKKGSFFNWFYFSINIGAFVSSSFIVWTQENAGWGIGFGIPALFMGLAIGSFFLGTPLYRFQKPGGSPITRILQVVVASFRKRRLVLPEDSSLLYETPDKRSAILGSRKLEHSDELRCLDRAAIVSDAERESGDNSNLWRLCTVTQVEELKTLIRMFPIWAAGIVFNSVYAQLSTMFVEQGTMMDTSIGSFKIPPASLSCFDVIS…
	PsNPF8.8	Psat7g086120		584	MGSINDDVPELEQGLLQDERSEQYTGDGSFDFRWKPAIKHSTGNWRACPFILGNECCERLAFFGIATNLVTYLTTKLHEGNVSAARNVGVWQGTCYLTPLIGAVLADGYWGRYWTIAVFSMIYFVGMCILTISASVPSLKPAECLGSVCPPASPVQYYMLYFGLYVIALGTGGVKACVLSFGADQFDDTDSKERARKASFFNWYYFSVDLGAVVSCTFIVWVQDNAGWGLGFGIPALFMGLSVGSFFLGTSLYRFQKPRGSPITRMCQVVLASVRKQNLVVPEDISLLYEMPDKKSGVERSRKLMHHDDLRYFDRAAIVAESENRSGDYSNPWRLCTVSQVEELKIFIRMLPIWATGIFFSAVYAQMSTLFVEQGTMMDTNISSFKLSPASLSTFDVAS…
	PsNPF8.9	Psat7g086160		589	MEHLEEPTRFLLEDSLLQSEDSIHTRDGSVNIKGELAIKRETGTWKSCPFVLGTFFCERLAYYGIATNLVTYLTTKLHQGLVSAAKNVTTLKGTCYLTPLVGSFFADAYLGRYWTIAVFYGIYLIGICILIISATIPALTPMECVNSVCPSATLAQSAVFFFGLFLIALGTGGIKPCIWPFGADQFDDTDHRERASKGSFFNWNYFTSNIGALLSVTILVWTEENVGWGLGYGISALFVGIAIVIFFLGTPMYRFQKPVGSPLTRICQVISAALFKWKLEVPQDICLLFEREMKNSSIERSHRLEHSDGLRFLDRAAVISDAEKERAEMTSPWRLCTVTQVEELKILIRIFPIWASGIIFCAVYAQMSSLFVEQGKMMDTTIASLKIPAASLSSFDIIA…
	PsNPF8.10 (New)	Psat5g015320		566	MEFMVSDDRVDRNGNVADKRTTGGWKAAPYIIMNEVIERLAFFSIAVNMIRYLVVEMHQTIPDSATHVTDWIGAAYVLTLLGAFLADAYMGRFKTIIVFSSIYAVGMFMLTISASVDTLRPQKSKEASQYQMSFLYVALGLVALGTGGIKPCVSSFGADQFDEGDEKEVVMKYSFFNWFYFAINMGALLAITILVYIQDRVGWGWGFGIPTVTTILSIVVLAIGIKYYRFQKPMGSPFTRFLQVIVASVKNHQRGVVVKDETHLYEVETTHSDIIGARKLQRTLQYKFFDKAAVVTEKDTIKDRWSVCTVTQVEEFKSFVKILPVWASTIALAISFAQMSTFFTSQASIMNRKLGNNFEIPTGSIPVFSAINGLILVPFYERCIIPVLKRFTGHHRGIT…
	PsNPF8.11 (New)	Psat5g015240		565	MDFLVSDGRVDRHGDIADKRTTGGWKAAPFIIMNEAVERVAYIAIAMNMTRYLVSEMHLTIPDSATHVTNWIGSAYVLTLLGAFIADAYFGRFKTILVFSFIYAAGMFMLTTSASLLCKAGAFVFLRSVKQMTFLLGALGLVALGTGGIKPCVSSFGADQFDEGDEKEVQKKYSFFNWFFFAINIGALLGTTLLVYIQEKLGWSWGFGIPTITTFLSIFVLAIGINHYRFQKPMGSPFTRFLQVIVASVKNHRRGVVVEKETQLYEVETTQSDIIGARKLQRTLQYRFLDKAAVVTSKDKINDRWSVCTVTQVEELKSIIKILPVWATTIALSISFAQMSSFFISQSNIMNRKLGNFEIPTGSVVTFGAINGLTLVPIYERFFIPILRKFTGHHRGITS…
	PsNPF8.12 (New)	Psat5g028360		565	MDFLVSDGRVDRHGDIADKRTTGGWKAAPFIIMNEAVERVAYIAIAMNMTRYLVSEMHLTIPDSATHVTNWIGSSYVLTLLGAFLADAYFGRFKTILVFSFIYAVGMFMLTTSASLLCKAGAFVFLRSVKQMTFLLGALGLVALGTGGIKPCVSSFGADQFDEGDEKEVQKKYSFFNWFFFAINIGALLGTTLLVYIQEKLGWSWGFGIPTITTFLSIFVLAIGINHYRFQKPMGSPFTRFLQVIVASVKNHRRGVVVKKETQLYEVETTQSDIIGARKLQRTLQYRFLDKAAVVTPKTKINDRWSVCTVTQVEEFKSILKILPVWATTIALSICLGQMSTFFISQSNIMNRKLGNFEIPTSSVTTFAAINGLILVPIYEQLFIPVLRKLTGHQCGITS…
	PsNPF8.13 (New)	Psat5g073240		189	MFGDVCPPATPAQYVMFFIGLYLIALGTGGIKPYMSSFRAYQFDDTDSRERVKKRSFFNWFYFSINIGALISSSFIVWVQDNTGWGLGFGIPALFMGLAIRSFFLGTPLYRFQKLRGSPLTRMCQVVAASFWKQNLDVPEDNSLLYETPDKSSAIEGSRELQHSDELSAPSCQIRSLLSKFTKAFTKAR-

## Sheet: Table 2
Supplementary Table 2. PsNPF gene expression. Data were extracted from the full-length Unigene set of expressed sequences from P. sativum (Alves-Carvalho et al., 2015). Stage A: 7-8 nodes, 5-6 opened leaves. Stage B: at beginning of flowering. Stage C: 20 days after begining of flowering. Stage D: germination, 5 days after imbibition.
	Stage E: 12 days after pollinisation. Stage F: 8 days after sowing. Stage G: 18 days after sowing, i.e. 10 days after inoculation.
		Shoot_A_HN	RootSys_A_HN	Shoot_A_LN	RootSys_A_LN	Nodule_A_LN	Root_B_LN	Nodule_B_LN	Leaf_B_LN	ApicNode_B_LN	Flower_B_LN	Stem_BC_LN	Tendril_BC_LN	LowerLeaf_C_LN	UpperLeaf_C_LN	Peduncle_C_LN	Pods_C_LN	Seeds_5dai	Seeds_12dap	Root_F_LN	Nodule_G_LN
PsNPF1.1	Psat7g015080	0.06792	0.393849	0.143012	0.320596	5.34824	0.442052	3.91882	0	0.984893	0.010462	0.835411	0.083666	0	0	0.475342	0.01133	0.04935	0.010292	0.147196	6.57199
PsNPF1.2	Psat5g299200	2.58731	11.8217	1.63019	8.63498	8.47851	13.216	7.62767	3.00054	0.192309	0.836765	12.869	7.63695	2.87677	2.61033	7.12951	1.48621	18.4144	19.031	10.5325	9.66017
PsNPF1.3	Psat0s258g0240	0.070377	2.2583	0.039308	2.58927	0.566033	3.04936	0.427787	0.020496	0.219543	0.113039	0.229196	0.043045	0.029791	0.047114	0.256217	0.048561	0.017028	0.722942	3.27145	0.716195
PsNPF1.4	Psat7g255240	0.280734	1.92523	0.251005	1.77397	1.37211	1.91068	1.16737	0.287773	0.685066	0.491447	0.657918	0.416842	0.226626	0.286006	0.776994	0.425754	4.68296	1.34443	2.18429	1.03894
PsNPF1.5	Psat6g033120	2.82734	11.9856	1.32642	17.7359	11.1946	9.59265	10.9119	1.75743	0.085047	0.091297	6.03728	0.596525	1.49842	0.496604	0.289261	0.146766	39.0731	0.060172	45.0184	1.99596
PsNPF1.6	Psat6g085840	1.804	0.096192	2.66752	0.110502	0.245722	0.092488	0.523673	7.53328	0.220212	0.831192	6.65086	9.32936	6.91657	12.1837	19.1641	0.055712	0.31731	0.233424	0.132306	0.064744
PsNPF1.7	Psat0s1315g0280	0.193296	0	0.087193	0.045025	0.011049	0.009169	0.019139	0.030143	0.48976	0.063804	0.020813	0.056275	0.014881	0.03859	0.021122	0.149696	0.050158	2.10146	0.046635	0.037392
PsNPF1.8 (New)	Psat5g023520	0	1.47051	0	0.978597	0.186187	0.857788	0.147355	0	0	0	0	0.016293	0	0	0	0	0	0	0.90273	0.17678
PsNPF2.1	Psat5g276840	1.00996	7.69159	1.17356	9.05825	1.80969	8.4338	1.88	1.99537	0.587799	2.48907	5.1279	4.86863	1.90641	2.20473	2.73448	0.372995	1.57222	0.42614	11.6828	2.37618
PsNPF2.2	Psat4g051720	0	0	0	0	0.010202	0	0.00881	0	0.227503	0.107711	0	0.003404	0	0	0	0	0.007699	0	0.009906	0.03067
PsNPF2.3	Psat3g132960	0	0	0	0.008671	0.489853	0	0.414465	0	0.019016	13.4703	0.058994	0.02491	0.071568	0.055781	0.060967	0.081283	0.008047	0.070491	0.017262	0.244187
PsNPF2.4	Psat4g053920	1.83031	0.673617	1.5291	0.583233	0.044954	0.464562	0.013159	1.62558	0.891386	1.76654	11.8407	5.10995	0.671392	0.995944	4.12645	0.180685	0.140728	1.64539	0.642477	0.248962
PsNPF2.5	Psat4g051880	3.10547	5.30506	3.46295	3.82469	4.55898	5.0183	3.82425	4.85295	4.035	5.93685	3.97179	3.93538	3.08577	5.34667	5.31654	3.61132	4.88525	6.33293	2.82768	5.07225
PsNPF2.6	Psat4g051840	2.17607	0.026434	2.14439	0.022093	7.64966	0.052358	6.53129	3.22873	0.028249	1.73279	1.45632	6.18697	2.31671	7.122	4.57475	0.43254	0.836704	9.5825	0.017093	3.64151
PsNPF2.7	Psat2g126520	6.71204	6.93582	5.55041	7.73505	6.02168	8.09814	3.88975	18.7874	3.89848	9.31581	0.943007	4.29615	14.4082	19.1977	6.71971	3.11389	25.5573	19.9137	6.19009	9.78407
PsNPF2.8	Psat0s1448g0200	0	0	0	0.008832	0	0	0	0	0	0	0.006677	0.010876	0	0	0.003451	0.082806	0	1.73357	0.003517	0.008152
PsNPF2.9 (New)	Psat4g053840	0.711429	0.285984	0.844753	0.432399	0.0282	0.576973	0	0.137361	2.88449	5.09473	0.118618	0.120896	0	0	0.106875	0.301011	2.36915	0.925056	0.49897	0.010752
PsNPF2.10 (New)	Psat4g053800	0.459506	0.282569	0.67516	0.217207	0	0.232377	0	0.089692	2.61144	4.40013	0.127266	0.238408	0.016871	0	0.300533	0.195476	1.57125	1.10456	0.167816	0.017829
PsNPF3.1	Psat2g097640	6.40545	0	7.18438	0.017341	6.35743	0.061705	3.57361	14.6298	1.01737	12.5593	1.15694	9.66499	9.46844	10.9052	6.84182	3.1405	7.33084	0.02014	0.003452	3.31854
PsNPF3.2	Psat0s1126g0080	0.051334	1.05332	0.009015	2.25306	8.03101	1.93893	9.38345	0.056018	0.376619	0.345977	0.015829	0.037799	1.19497	0.107848	0.013079	0.049955	4.03353	2.3734	3.69692	2.56924
PsNPF3.3	Psat3g081520	1.73216	0.02987	2.06693	0.083129	9.5394	0.050627	6.30694	3.02051	2.2337	4.00263	0.037704	1.40162	0.719697	0.981342	0.142772	0.718874	66.3326	0	0.026466	2.39337
PsNPF3.4	Psat3g081400	0	17.1254	0.009188	15.8702	4.39499	17.4696	4.26155	0.009518	0	0.010077	0.025815	0.010509	0.007044	0.009157	0.003334	0	0.126757	0	12.8057	2.83072
PsNPF3.5 (New)	Psat3g081600	0	0.023159	0.010402	0.106404	20.2019	0.266726	18.4387	0	0	0	0.003657	0.011925	0.008008	0	0	0	0.008985	0.011237	0.003857	14.7819
PsNPF4.1	Psat0s2625g0080	0	0	0	0	0	0	0	0	0	0	0.003731	0	0	0	0	0.14122	0.009165	0.114629	0.003935	0.004544
PsNPF4.2	Psat3g152280	0	0	0	0	0.036222	0.020171	0	0.022048	0.043261	0	0.014922	0.028388	0.008174	0.010548	0.023186	0.359522	0.009165	0.848254	0.047226	0.036352
PsNPF4.3	Psat3g152120	0	0	0	0	0	0.010228	0	0	0.021922	0	0.003781	0.028777	0	0.021375	0	0.01289	0	0.325315	0	0.027625
PsNPF4.4	Psat1g223920	2.30138	2.78245	2.68476	3.52631	0.820837	3.04781	0.79752	2.20955	1.0608	1.20659	7.98117	2.12362	0.336222	0.484299	2.38254	1.1254	0.352544	0.010502	0.601557	4.36313
PsNPF4.5	Psat0ss8606g0080	18.2078	10.4759	13.4394	7.55298	0.953202	5.33033	0.852398	2.7528	5.35588	11.6558	38.2266	8.44465	1.38963	2.15061	41.4476	11.6295	2.29083	7.07054	7.32802	0.438862
PsNPF4.6	Psat5g045120	0.082841	6.31874	0.019376	6.30357	16.827	7.44521	14.2678	0.030143	0	0.255217	0.718276	0.177474	0.014881	0	0.105609	0.019192	3.87885	0.052298	8.48759	6.7305
PsNPF4.7	Psat7g067040	0	0.041213	0	0.02581	0.010568	0	0.018276	0	0	0	0	0	0	0	0	0	0	0	0	0
PsNPF4.8	Psat7g067000	0	0	0	0.00857	0.368505	0.008709	0.373203	0	0	0	0.003239	0	0	0	0.013388	0	0	0	0	0.027702
PsNPF4.9	Psat4g053360	5.41827	0.120146	5.85494	0.159272	0.285609	0.129003	0.34774	0.012492	21.0703	7.85981	2.15079	0.041157	0	0.01189	1.26297	5.78529	0.062247	0	0.294712	0.090755
PsNPF4.10	Psat4g131920	1.38279	7.09526	1.43681	6.78293	123.895	5.11078	89.2039	2.73257	4.75162	2.76703	5.46903	2.92601	1.92077	3.26049	10.0635	1.49627	7.68321	23.5011	4.44137	72.9058
PsNPF4.11 (New)	Psat6g156440	19.8932	8.71475	16.8039	6.45005	1.33359	6.25997	1.27591	1.19979	18.1014	22.5313	23.3386	3.98122	0.59174	0.582021	10.5046	32.2871	2.31495	3.10092	10.7098	0.62837
PsNPF4.12 (New)	Psat1g193440	0	0.010127	0.0091	0.008456	0.010392	0.025765	0.044899	0	0.018546	0.099801	0.012784	0.031225	0	0	0.013206	5.94406	0.007846	147.113	0.030292	0.074206
PsNPF4.13 (New)	Psat4g020560	0.013108	0.040975	0.046026	0.042767	0.031527	0.017383	0.009085	0.095371	0.065661	0.060579	0.04203	0.05967	0.070577	0.009174	0.070149	0.040089	0.023813	0.158942	0.054483	0.0395
PsNPF4.14 (New)	Psat1g158440	0	0	0	0	0	0	0	0.014626	0.05705	0.01544	0	0.005375	0	0	0	0	0	0.015145	0	0
PsNPF4.15 (New)	Psat2g124840	3.04725	1.45338	2.57789	0.967057	0.325281	1.12581	0.372942	12.3817	0.125708	0.826866	21.2569	32.0746	19.68	34.6644	74.061	0.119278	2.76605	0.617783	0.215367	2.09632
PsNPF4.16 (New)	Psat2g124800	4.74467	2.72539	5.29579	1.5571	0.295479	1.29394	0.399873	20.4783	0.246944	1.12429	55.5166	55.6656	40.6325	59.8981	134.96	0.159662	4.50953	0.694767	0.800662	3.97037
PsNPF5.1	Psat5g131680	6.83981	0.290057	10.2638	0.683196	1.22277	0.566116	1.30266	15.4297	3.48928	6.44016	9.35146	8.43615	11.8988	17.9487	17.8991	7.78177	0.881027	11.1535	0.453455	0.344256
PsNPF5.2	Psat6g124520	6.57358	9.92528	9.62361	7.79391	4.63474	9.1943	5.19327	26.5256	1.74886	5.38001	5.89939	14.0607	16.7184	19.1851	10.188	1.60099	3.28518	2.96556	5.19717	10.3733
PsNPF5.3	Psat3g055360	0	0.25808	0	0.293078	0.010588	0.622077	0	0	0.047264	0	0.009775	0.007075	0	0	0	0	0	0	0.054912	0.015921
PsNPF5.4	Psat6g202240	0.016354	0.150191	0	0.175558	53.9693	0.109232	40.5548	0.011912	0.01167	0.06297	0.036242	0.013144	0.017684	0.011362	0.012534	0.027272	0.009898	0.111364	0.068034	52.7345
PsNPF5.5	Psat3g055560	0.128581	0.130657	0.090319	0.10909	0.05158	0.042604	0.044556	0.084188	10.8229	0.366445	0.085639	0.037872	0.041524	0.099043	0.114663	0.1287	0.02336	0.126692	0.123578	0.081407
PsNPF5.6	Psat3g055440	0.77039	0.061227	0.751936	0.068164	0.01047	0.034627	0	0.094999	5.31685	0.76436	0.164253	0.10489	0.00703	0.091394	0.109803	0.900326	0.253023	0.494782	0.027135	0.00787
PsNPF5.7	Psat3g055480	0	0.245379	0	0.384163	109.707	0.312267	92.9743	0	0	0	0.009681	0	0	0	0.003334	0	0.023767	0	0.02379	62.8594
PsNPF5.8	Psat4g144560	5.13599	2.5134	5.19547	2.02963	1.02903	1.76466	1.10089	4.48813	6.80034	7.94237	6.71865	4.27116	2.02441	3.44523	5.31341	7.75788	3.46268	17.3935	2.85072	0.949086
PsNPF5.9	Psat5g221320	0.014096	0.011006	0.039551	0.027575	0.011271	0	0	0.030777	0	0.032569	0.305787	0.049073	0	0.009843	0.071895	0	0.008534	0.042708	0.043952	0.021196
PsNPF5.10	Psat5g221360	0.014008	0.021876	0.029481	0	0	0.05584	0	0	0.110174	5.71801	0.024173	0.018756	0.007551	0.009784	0.039293	1.11372	0.008481	15.4387	0.021838	0.01264
PsNPF5.11	Psat3g133200	8.33556	15.0543	7.77797	10.2164	0.202716	22.3546	0.119971	17.5169	1.41948	2.69733	34.241	21.2402	8.8349	18.8342	54.1615	1.54743	0.11288	1.79601	3.84319	7.13917
PsNPF5.12	Psat7g241560	0.305654	8.73256	0.429196	9.60693	1.75708	13.5664	1.30787	0.406113	2.7954	1.93457	3.07752	0.612068	0.551073	1.58976	2.56399	3.49519	0.128752	75.5766	7.01521	3.21847
PsNPF5.13	Psat5g125120	0.952536	0.076565	0.668232	0.03654	22.082	0.05584	28.4269	3.09919	0	0	0.013813	0.225077	0.354882	0.645711	0.053581	0	0.016962	0.010611	0.065515	3.75836
PsNPF5.14	Psat5g125000	0.287264	4.05121	0.394308	4.42182	0.544419	5.42082	0.640229	0.265998	0.056164	0.413181	9.31699	1.04204	0.210896	0.276458	3.13336	0.355774	0.07907	1.77132	3.09683	4.46237
PsNPF5.15	Psat5g125080	2.59142	0.114219	1.90339	0.19126	1.22463	0.105813	1.07073	1.04429	4.83004	4.55408	1.18025	0.971355	0.443721	0.825101	1.39659	3.04074	0.120705	0.543789	0.051786	0.520399
PsNPF5.16	Psat1g078400	7.59834	8.8664	7.78093	7.2064	7.45386	12.7	5.77185	23.4299	0.958864	5.0769	12.1236	13.1512	9.1022	11.8918	21.8288	0.928376	1.78343	16.8422	5.97691	7.81687
PsNPF5.17	Psat7g259080	2.41126	2.38896	2.43649	1.94785	0.58442	1.62864	0.649378	0.55149	4.00647	3.8735	2.01116	0.763787	0.237598	0.48142	1.05039	9.31835	1.2347	4.69726	3.2685	0.364881
PsNPF5.18	Psat1g003400	5.84523	12.2379	6.32994	9.96832	5.13032	11.1437	4.64005	10.1755	4.72334	5.36668	6.63581	6.62412	6.11829	7.62527	8.36568	5.93518	5.66537	4.6994	10.2136	3.61745
PsNPF5.19	Psat0s4032g0040	0.982303	0.594259	1.1358	0.670036	0.221409	0.762637	0.153423	0.896094	2.82385	2.95168	2.62654	0.84844	0.439903	0.788518	2.0072	4.73095	0.167534	3.11284	0.409797	0.079096
PsNPF5.20	Psat7g145840	0.414952	0.706885	0.439498	0.661926	0.21598	0.59917	0.092255	0.631892	0.220079	0.28656	0.263244	0.387111	0.437732	0.72796	0.461056	0.328617	0.09712	0.184629	1.00271	0.097847
PsNPF5.21 (New)	Psat3g055400	0.038946	0.111609	0.054706	0.262623	102.872	0.232342	68.4596	0.037779	0.009291	0.019999	0.329823	0.059094	0.041931	0.036353	0.039695	0	0.047168	0	0.003372	43.4099
PsNPF5.22 (New)	Psat7g144960	0	0.053646	0	0.021859	0	0	0	0	0	0	0	0	0	0	0	0	0	0.026838	0	0.009913
PsNPF5.23 (New)	Psat0s1306g0040	0	0	0	0	0	0	0	0	0	0	0	0	0	0	0	0	0	0	0	0
PsNPF5.24 (New)	Psat7g144920	0.830675	0.823953	1.19407	0.676904	0.514102	0.791948	0.502651	2.42214	0.624965	0.850826	1.61531	1.24037	1.07064	2.63031	1.44257	0.877931	0.35507	0.855719	1.38087	0.159041
PsNPF5.25 (New)	Psat7g145760	0.30116	0.834523	0.573626	0.76108	0	0.959224	0	0	0	0	0.782576	0.079397	0	0	0.885729	0	0	0	0.405275	0
PsNPF6.1	Psat3g207040	2.93251	0.255916	2.31718	0.181984	0.116885	0.296628	0.092378	0.414232	3.1158	19.1912	0.349875	0.301725	0.065162	0.186998	0.182062	3.80079	0.653198	38.8741	0.179382	0.179283
PsNPF6.2	Psat4g038520	26.0591	3.03328	31.6801	2.74484	0.043338	2.45133	0.028131	52.8965	9.28115	16.5787	32.6458	49.9721	20.7999	28.359	20.759	8.10157	1.72182	0.758571	4.68519	0.195526
PsNPF6.3	Psat0s3925g0040	0.53954	14.808	0.434306	10.9307	4.7574	13.3863	11.2271	0.593618	1.07347	3.50702	1.65853	2.46308	0.5952	1.15109	0.620422	1.12687	1.87262	2.09422	18.3438	5.60255
PsNPF6.4	Psat2g178360	17.0432	187.608	19.8444	112.696	2.35958	84.9719	0.753759	37.0473	1.08182	2.4109	8.7173	25.745	39.9764	39.1947	19.9404	6.91026	0.048187	0.201009	0.520277	2.41722
PsNPF6.5	Psat2g178520	0.32341	0.014166	0.264853	0.017582	0	0.012214	0	0.013274	0.327749	0.421656	3.06509	0.214981	0	0.0126	2.72544	0.059942	0	0	0.021005	0.005432
PsNPF6.6	Psat4g071440	0.013289	0.010384	0.037321	0.008671	0.021298	0	0	0	0.009508	0.675562	0.058994	0.04982	0	0	0	0.022168	0	1.12786	0.003452	0.032025
PsNPF6.7	Psat2g025760	23.8101	1.78257	25.2301	1.39098	2.20402	0.979513	1.80235	48.226	13.498	16.797	7.19633	17.1627	36.0819	40.5066	7.98996	17.9458	0.601397	1.66785	2.04245	0.664431
PsNPF7.1	Psat6g242600	0	0.189115	0	0.429899	191.677	0.428344	125.336	0	0	0	0.009949	0	0	0	0	0	0.02443	0	0.006988	60.3409
PsNPF7.2	Psat6g142760	0	0.020646	0	0	0	0.043808	0	0.057673	0.59553	3.00181	0.006517	0.007075	0.021342	0	0.013468	0.055095	0	3.50396	0	0
PsNPF7.3	Psat4g078440	7.46286	15.5476	9.02692	21.6801	23.9165	20.9331	12.0898	9.55494	1.34915	29.2079	29.3684	20.1634	6.40404	17.945	14.0862	0.278602	2.20363	8.64294	5.97362	14.5594
PsNPF7.4	Psat2g173680	9.89914	66.3923	3.62197	50.8601	58.329	28.1608	24.4513	2.29064	1.07569	52.5251	4.78767	4.21532	0.453367	0.698481	0.772558	0.500742	0.690473	1.34534	18.3937	98.6079
PsNPF7.5 (New)	Psat0s3070g0120	0	0	0	0	0	0	0.009174	0.019262	0.255723	0.183521	0.013059	0.014178	0.014256	0.101875	0.016868	0.00368	0.040077	0.050154	0.003439	0
PsNPF7.6 (New)	Psat7g232000	9.0237	3.32572	5.65912	3.05259	5.68595	3.86057	4.73609	4.50574	13.0548	8.08804	4.89694	3.77979	2.7601	3.34733	4.7055	8.61147	3.98237	16.9686	4.55982	4.49014
PsNPF8.1	Psat0s4602g0080	0	0.010783	0	0.009005	0.011049	0.018338	0	0	0.246847	0.021268	0.017021	0.048066	0	0.009648	0.014081	0.02303	0.016719	0.01046	0.017937	0.016619
PsNPF8.2	Psat5g161760	7.10978	2.49656	8.81363	2.93724	25.086	3.71591	23.9124	28.4468	2.49304	3.79921	9.10817	17.3316	14.6461	21.213	11.0763	1.99953	4.22966	1.88934	2.31775	34.2195
PsNPF8.3	Psat7g247760	7.9107	0.24503	3.6183	0.10676	0.043675	0.099595	0.06617	2.38202	3.86313	3.27755	2.27681	1.08841	1.34477	1.32522	0.365095	1.41813	0.18168	9.92008	0.205525	0.05337
PsNPF8.4	Psat2g059640	0.014008	0.010938	0.019654	0	0	0	0	0	0.050079	0.010789	0.006907	0.041264	0	0	0	0.058412	0.008481	0	0.014559	0.016854
PsNPF8.5	Psat7g086240	10.0838	23.3115	13.883	20.4792	11.1355	22.5458	9.90564	27.2146	7.6663	17.4892	16.5761	18.4586	15.7746	18.9462	19.2879	6.13723	130.715	14.2584	17.889	16.2245
PsNPF8.6	Psat3g173600	2.74062	10.6802	2.24904	7.2118	2.13624	8.51699	2.16132	3.69275	2.53955	1.57536	2.78803	2.81567	2.28365	3.18579	3.66495	1.63931	3.06598	2.45713	6.5162	4.20455
PsNPF8.7	Psat7g087440	3.07532	9.08829	3.08332	7.19639	3.66086	7.47187	4.0594	4.97675	2.4144	3.26744	3.63584	4.54776	3.37065	4.82137	5.27248	1.73189	3.02934	2.38473	5.94029	4.33136
PsNPF8.8	Psat7g086120	4.17925	6.55117	3.88363	4.02862	2.01737	8.66509	1.94956	22.2516	5.41432	6.91248	6.44479	11.2664	7.34456	7.05449	13.7014	3.94004	4.97196	11.3575	3.78616	8.01969
PsNPF8.9	Psat7g086160	2.09558	4.21788	1.49927	3.04607	1.0735	7.62715	0.937602	12.555	1.86946	2.0227	4.81823	6.70171	4.64975	4.3426	8.67048	0.671114	3.38114	4.94483	2.91493	5.8133
PsNPF8.10 (New)	Psat5g015320	7.54903	0	8.96408	0	0.011114	0	0	0.480313	15.1936	11.3956	0.389891	0.272486	0.014974	0.028828	0.056092	13.2839	1.98981	6.65613	0.018048	0
PsNPF8.11 (New)	Psat5g015240	0.027842	0.0415	0	0.045394	0	0.027741	0	0	0.009958	0	0.027457	0.007456	0	0	0.024848	0.131405	0	0.316296	0.021703	0.011443
PsNPF8.12 (New)	Psat5g028360	0	0.012854	0	0	0.011137	0	0	0	0	0	0	0.003728	0	0	0	0.004083	0.008429	0.02163	0.003617	0.005309
PsNPF8.13 (New)	Psat5g073240	0.062417	0	0.041543	0	0	0.092758	0	0.182541	0	0	0.075011	0.067192	0.035864	0.078564	0.049508	0	0.336859	0	0	0.034175

## Sheet: Table 3
Supplementary Table 3. Orthologs of NPFs studied in the literature.
The NPFs shown in red were studied in the literature and used as queries in a Blatp search to find the ortholog in the other two species.
P. sativum		M. truncatula			L. japonicus
Gene name	Gene ID (v1a)	Gene name	Gene ID (Mt4.0)	Gene ID (Mt5.0)	Gene name	Gene ID (v3.0)	Reference
PsNPF1.5	Psat6g033120	MtNPF1.7	Medtr1g009200.1	MtrunA17_Chr1g0147631	LjNPF1.5	Lj0g3v0061149.1	Harris and Dickstein, 2010
PsNPF7.1	Psat6g242600	MtNPF7.6	Medtr1g116930.1	MtrunA17_Chr1g0213711	LjNPF7.4	Lj4g3v1151760.1	Wang et al., 2020
P. sativum		M. truncatula			L. japonicus
PsNPF8.4	Psat2g059640.1	MtNPF8.2	Medtr3g462710.1	MtrunA17_Chr3g0104011	LjNPF8.6	Lj3g3v2681670.1	Valkov et al., 2017
PsNPF3.1	Psat2g097640.1	MtNPF3.1	Medtr5g055000.1	MtrunA17_Chr5g0422881	LjNPF3.1	Lj2g3v1155500.1	Vittozzi et al., 2021
P. sativum		M. truncatula			L. japonicus
PsNPF3.5	Psat3g081600.1	MtNPF3.3	Medtr7g088790.1	MtrunA17_Chr7g0255601	LjNPF3.4	Lj1g3v4082070.1	Alves-Carvalho et al., 2015
PsNPF4.8	Psat7g067000.1	MtNPF4.13	Medtr8g087810.1	MtrunA17_Chr8g0379991	LjNPF4.3	Lj4g3v2618640.1	Alves-Carvalho et al., 2015
PsNPF5.4	Psat6g202240.1	MtNPF5.12	Medtr1g042310.1	MtrunA17_Chr1g0166791	LjNPF5.6	Lj6g3v0026660.1	Alves-Carvalho et al., 2015
PsNPF5.7	Psat3g055480.1	MtNPF5.4	Medtr7g098180.1	MtrunA17_Chr7g0261791	LjNPF5.7	Lj1g3v4515810.1	Alves-Carvalho et al., 2015
PsNPF5.21	Psat3g055400.1	MtNPF5.5	Medtr7g098220.1	MtrunA17_Chr7g0261851	LjNPF5.7	Lj1g3v4515810.1	Alves-Carvalho et al., 2015
PsNPF7.1	Psat6g242600.1	MtNPF7.6	Medtr1g116930.1	MtrunA17_Chr1g0213711	LjNPF7.5	Lj2g3v1985190.1	Alves-Carvalho et al., 2015
P. sativum		M. truncatula			L. japonicus
PsNPF4.10	Psat4g131920.1	MtNPF4.16	Medtr8g469310.1	MtrunA17_Chr8g0362711	LjNPF4.6	Lj2g3v1339020.1	Alves-Carvalho et al., 2015
PsNPF7.4	Psat2g173680.1	MtNPF7.9	Medtr5g014150.1	MtrunA17_Chr5g0400371	LjNPF7.5	Lj2g3v1985190.1	Alves-Carvalho et al., 2015
PsNPF8.2	Psat5g161760.1	MtNPF8.2	Medtr3g462710.1	MtrunA17_Chr3g0104011	LjNPF8.6	Lj3g3v2681670.1	Alves-Carvalho et al., 2015
